# Supplementary material for: Stimmungsbild des ärztlichen Nachwuchses in der Frauenheilkunde und Geburtshilfe in Norddeutschland
Source: Springer Nature journal article supplement (doi:10.1007/s00129-022-04942-5), 2022-05-02
Supplement: MOESM1 [file 20362630]

## F1 Welchem Geburtsjahrgang gehören Sie an?

Beantwortet: 122 Übersprungen: 0

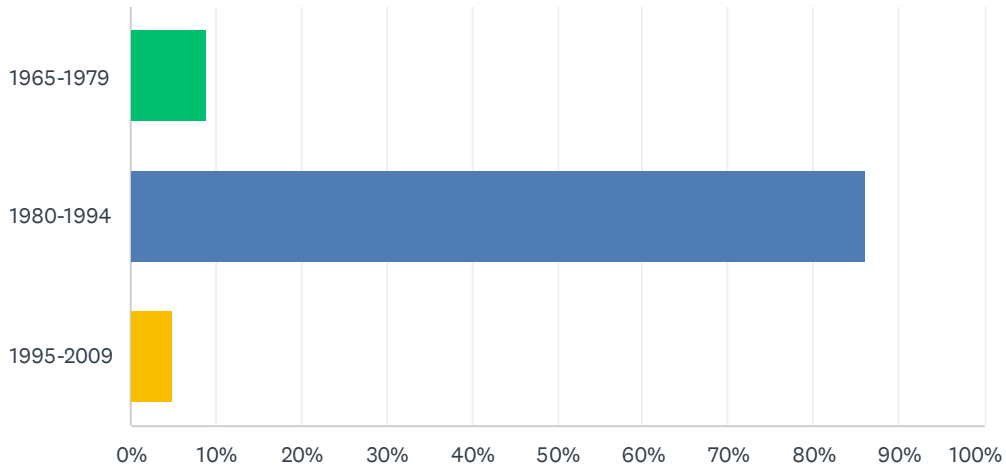

| ANTWORTOPTIONEN | BEANTWORTUNGEN |            |
|-----------------|----------------|------------|
| 1965-1979       | 9.02%          | 11         |
| 1980-1994       | 86.07%         | 105        |
| 1995-2009       | 4.92%          | 6          |
| <b>GESAMT</b>   |                | <b>122</b> |

## F2 Welchem Geschlecht fühlen Sie sich am ehesten zugehörig?

Beantwortet: 122 Übersprungen: 0

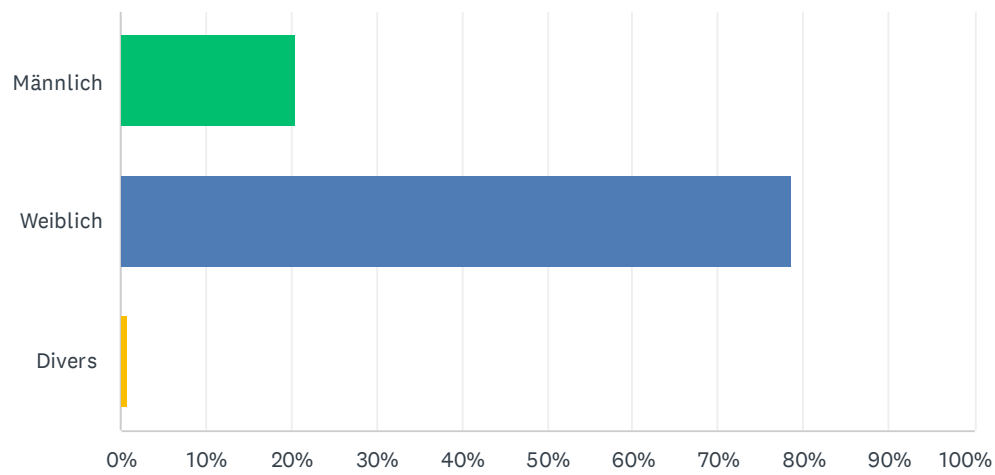

| ANTWORTOPTIONEN | BEANTWORTUNGEN |            |
|-----------------|----------------|------------|
| Männlich        | 20.49%         | 25         |
| Weiblich        | 78.69%         | 96         |
| Divers          | 0.82%          | 1          |
| <b>GESAMT</b>   |                | <b>122</b> |

### F3 In welchem Weiterbildungsjahr befinden Sie sich?

Beantwortet: 122 Übersprungen: 0

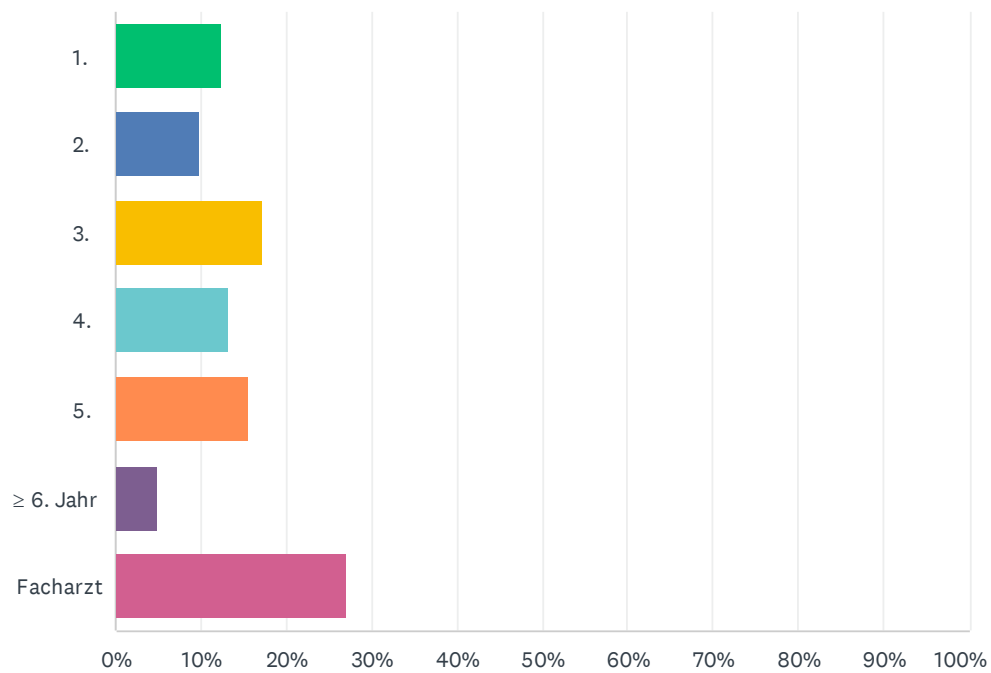

| ANTWORTOPTIONEN | BEANTWORTUNGEN |            |
|-----------------|----------------|------------|
| 1.              | 12.30%         | 15         |
| 2.              | 9.84%          | 12         |
| 3.              | 17.21%         | 21         |
| 4.              | 13.11%         | 16         |
| 5.              | 15.57%         | 19         |
| ≥ 6. Jahr       | 4.92%          | 6          |
| Facharzt        | 27.05%         | 33         |
| <b>GESAMT</b>   |                | <b>122</b> |

## F4 Haben Sie promoviert?

Beantwortet: 122 Übersprungen: 0

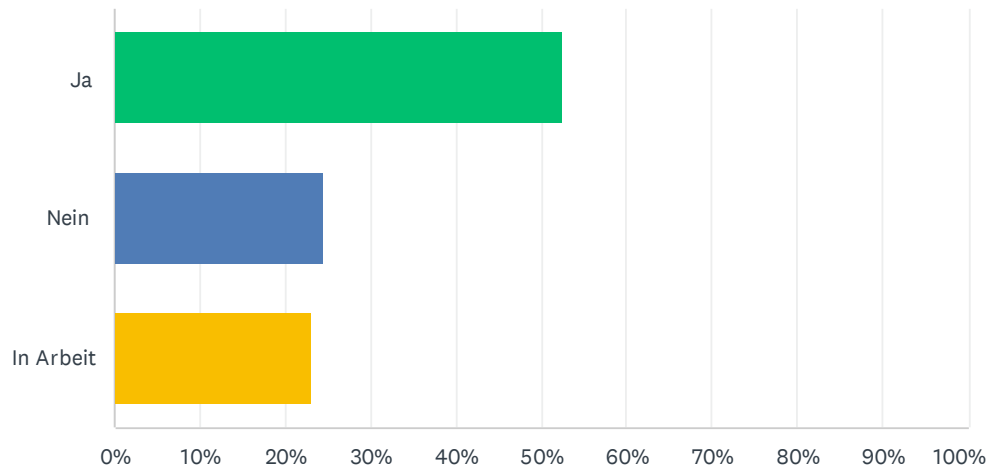

| ANTWORTOPTIONEN | BEANTWORTUNGEN |            |
|-----------------|----------------|------------|
| Ja              | 52.46%         | 64         |
| Nein            | 24.59%         | 30         |
| In Arbeit       | 22.95%         | 28         |
| <b>GESAMT</b>   |                | <b>122</b> |

## F5 Haben Sie bereits eine Familie gegründet bzw. haben Sie Kinder?

Beantwortet: 122 Übersprungen: 0

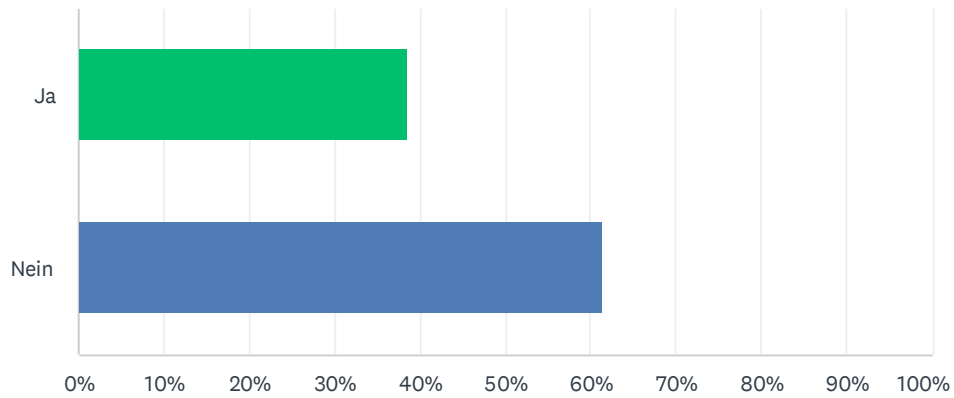

| ANTWORTOPTIONEN | BEANTWORTUNGEN |     |
|-----------------|----------------|-----|
| Ja              | 38.52%         | 47  |
| Nein            | 61.48%         | 75  |
| GESAMT          |                | 122 |

## F6 Arbeiten Sie derzeit in Vollzeit oder Teilzeit?

Beantwortet: 122 Übersprungen: 0

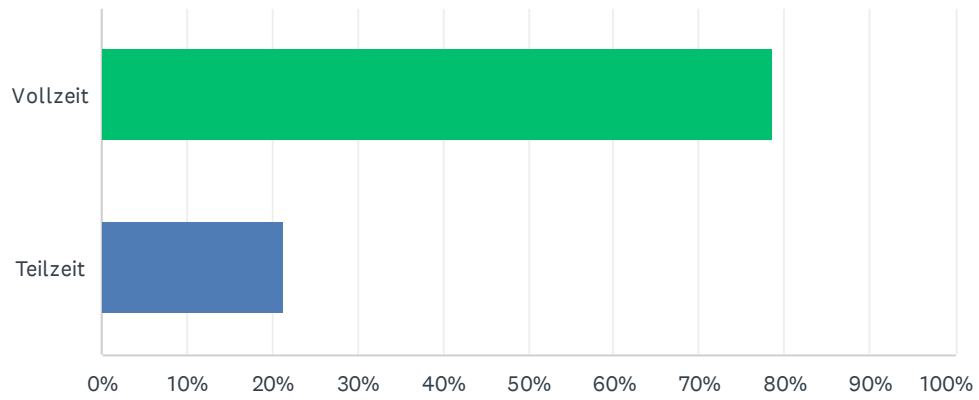

| ANTWORTOPTIONEN | BEANTWORTUNGEN |     |
|-----------------|----------------|-----|
| Vollzeit        | 78.69%         | 96  |
| Teilzeit        | 21.31%         | 26  |
| GESAMT          |                | 122 |

## F7 Spezifizieren Sie bitte Ihre Arbeit in Teilzeit:

Beantwortet: 26 Übersprungen: 96

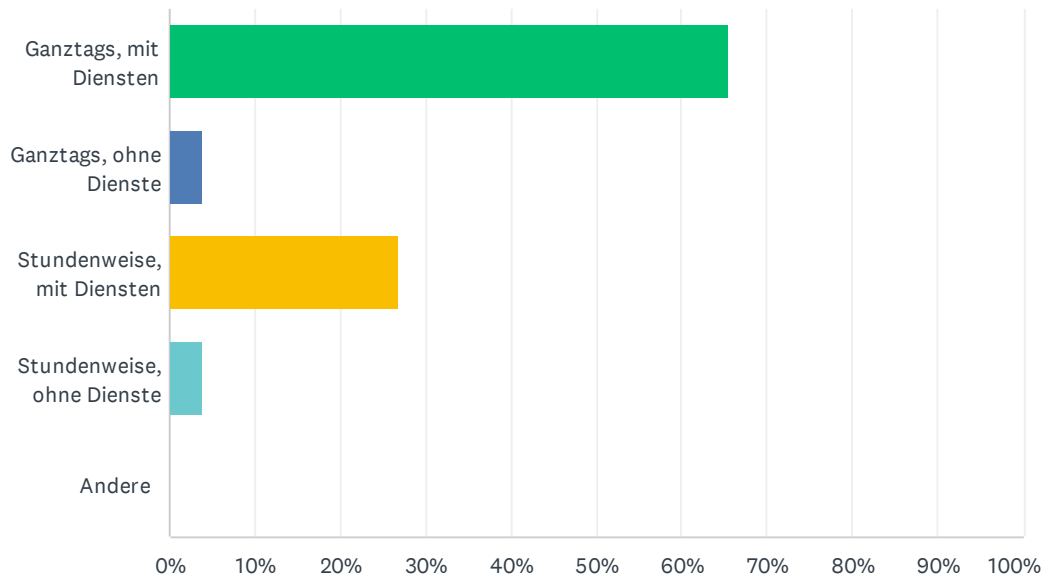

| ANTWORTOPTIONEN            | BEANTWORTUNGEN |           |
|----------------------------|----------------|-----------|
| Ganztags, mit Diensten     | 65.38%         | 17        |
| Ganztags, ohne Dienste     | 3.85%          | 1         |
| Stundenweise, mit Diensten | 26.92%         | 7         |
| Stundenweise, ohne Dienste | 3.85%          | 1         |
| Andere                     | 0.00%          | 0         |
| <b>GESAMT</b>              |                | <b>26</b> |

## F8 Arbeiten Sie an einer Universitätsklinik, einem akademischen Lehrkrankenhaus oder an einer kommunalen Klinik?

Beantwortet: 122 Übersprungen: 0

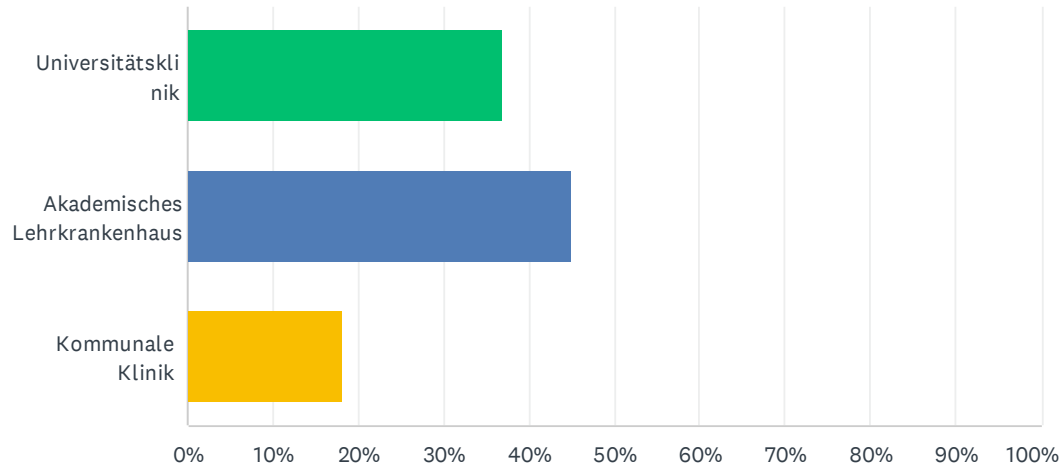

| ANTWORTOPTIONEN              | BEANTWORTUNGEN |     |
|------------------------------|----------------|-----|
| Universitätsklinik           | 36.89%         | 45  |
| Akademisches Lehrkrankenhaus | 45.08%         | 55  |
| Kommunale Klinik             | 18.03%         | 22  |
| GESAMT                       |                | 122 |



## F9 Wie beurteilen Sie Ihre Arbeitsbedingungen?

Beantwortet: 119 Übersprungen: 3

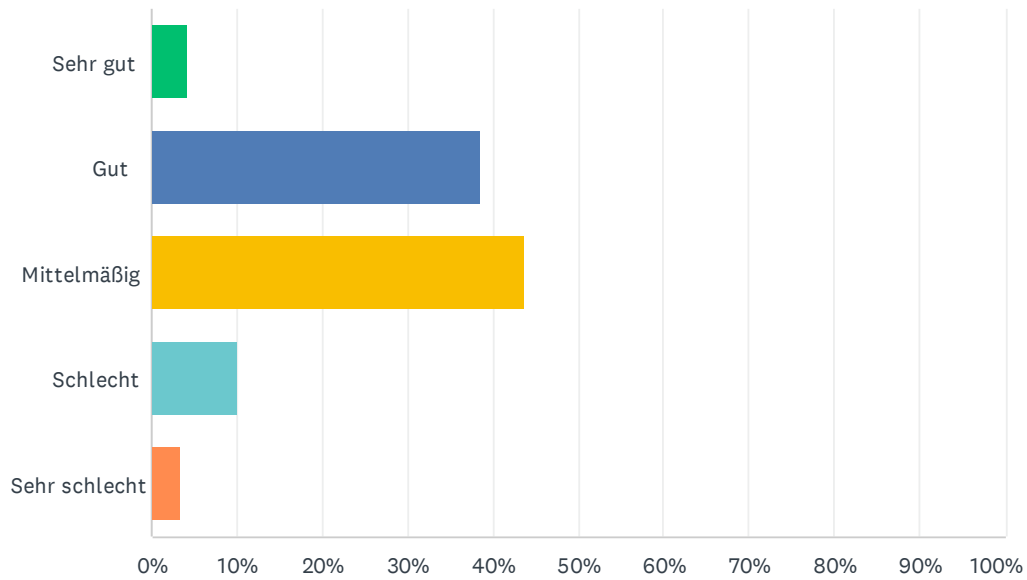

| ANTWORTOPTIONEN | BEANTWORTUNGEN |            |
|-----------------|----------------|------------|
| Sehr gut        | 4.20%          | 5          |
| Gut             | 38.66%         | 46         |
| Mittelmäßig     | 43.70%         | 52         |
| Schlecht        | 10.08%         | 12         |
| Sehr schlecht   | 3.36%          | 4          |
| <b>GESAMT</b>   |                | <b>119</b> |

## F10 Wie schätzen Sie Ihre subjektiv empfundene Arbeitsbelastung ein?

Beantwortet: 119 Übersprungen: 3

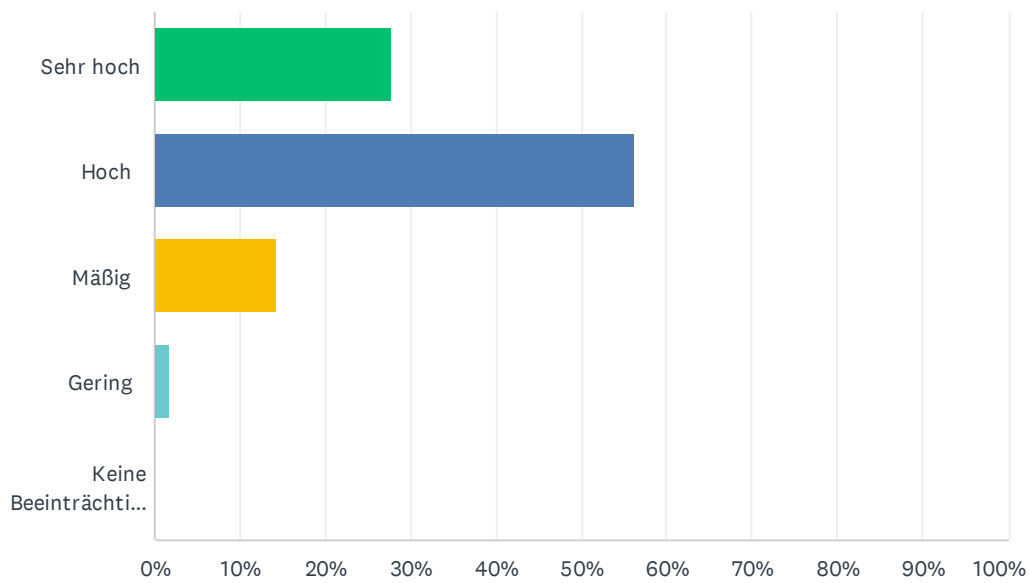

| ANTWORTOPTIONEN        | BEANTWORTUNGEN |            |
|------------------------|----------------|------------|
| Sehr hoch              | 27.73%         | 33         |
| Hoch                   | 56.30%         | 67         |
| Mäßig                  | 14.29%         | 17         |
| Gering                 | 1.68%          | 2          |
| Keine Beeinträchtigung | 0.00%          | 0          |
| <b>GESAMT</b>          |                | <b>119</b> |

## F11 Wie beurteilen Sie Ihre Einarbeitung als Berufsanfänger bzw. zu Beginn einer neuen Rotation?

Beantwortet: 119 Übersprungen: 3

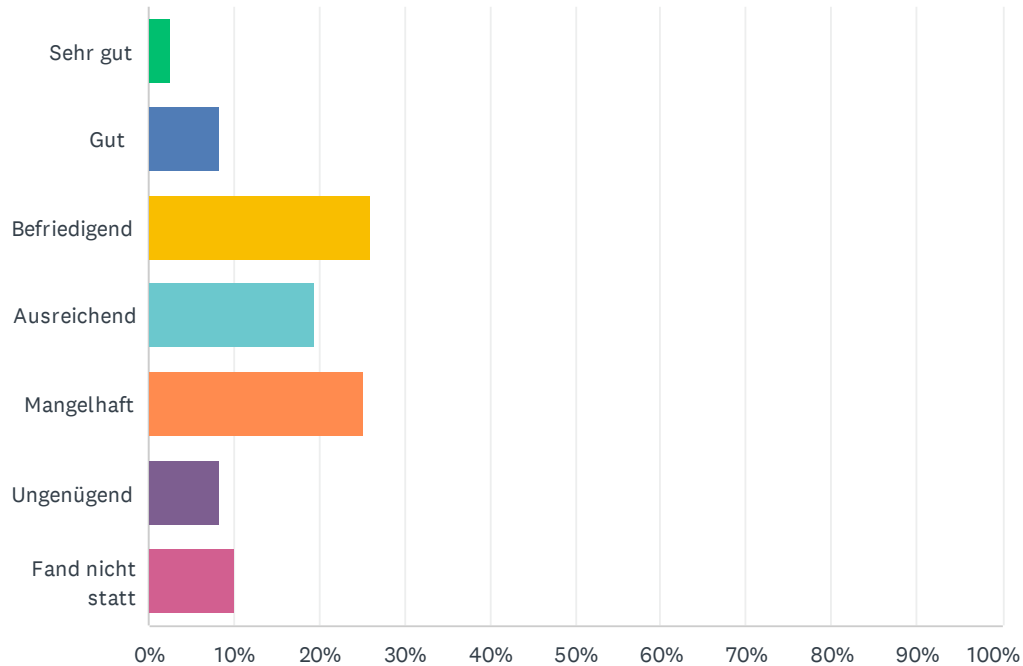

| ANTWORTOPTIONEN  | BEANTWORTUNGEN |            |
|------------------|----------------|------------|
| Sehr gut         | 2.52%          | 3          |
| Gut              | 8.40%          | 10         |
| Befriedigend     | 26.05%         | 31         |
| Ausreichend      | 19.33%         | 23         |
| Mangelhaft       | 25.21%         | 30         |
| Ungenügend       | 8.40%          | 10         |
| Fand nicht statt | 10.08%         | 12         |
| <b>GESAMT</b>    |                | <b>119</b> |

## F12 Sind Sie zufrieden mit Ihrem derzeitigen Einkommen?

Beantwortet: 119 Übersprungen: 3

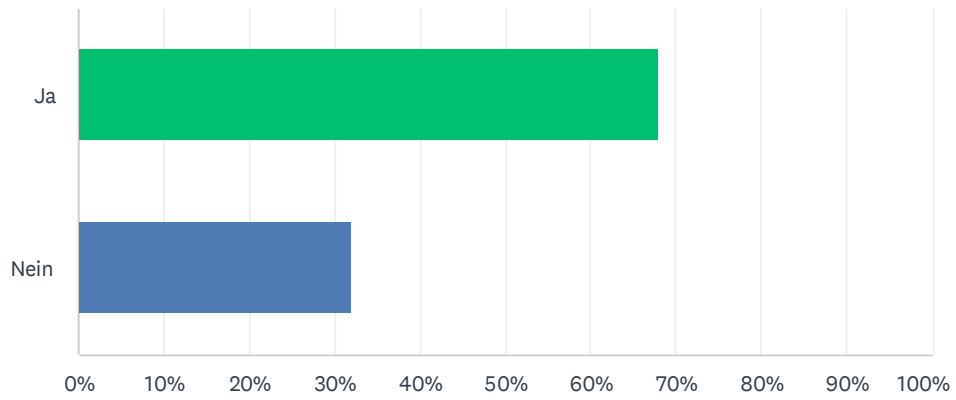

| ANTWORTOPTIONEN | BEANTWORTUNGEN |     |
|-----------------|----------------|-----|
| Ja              | 68.07%         | 81  |
| Nein            | 31.93%         | 38  |
| GESAMT          |                | 119 |

## F13 Halten Sie Ihr Einkommen in Bezug auf Ihre geleistete Arbeit und Verantwortung für angemessen?

Beantwortet: 120 Übersprungen: 2

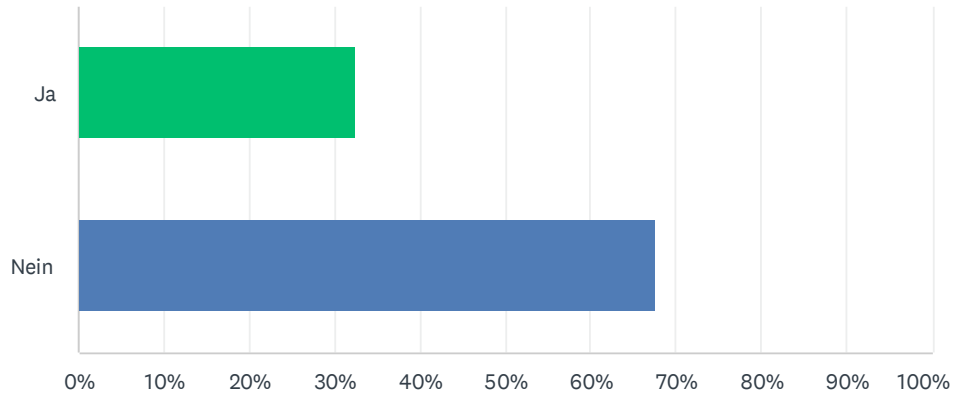

| ANTWORTOPTIONEN | BEANTWORTUNGEN |     |
|-----------------|----------------|-----|
| Ja              | 32.50%         | 39  |
| Nein            | 67.50%         | 81  |
| GESAMT          |                | 120 |

## F14 Wie hoch fällt die tariflich vereinbarte Wochenarbeitszeit Ihrer Vollzeitstelle aus?

Beantwortet: 120 Übersprungen: 2

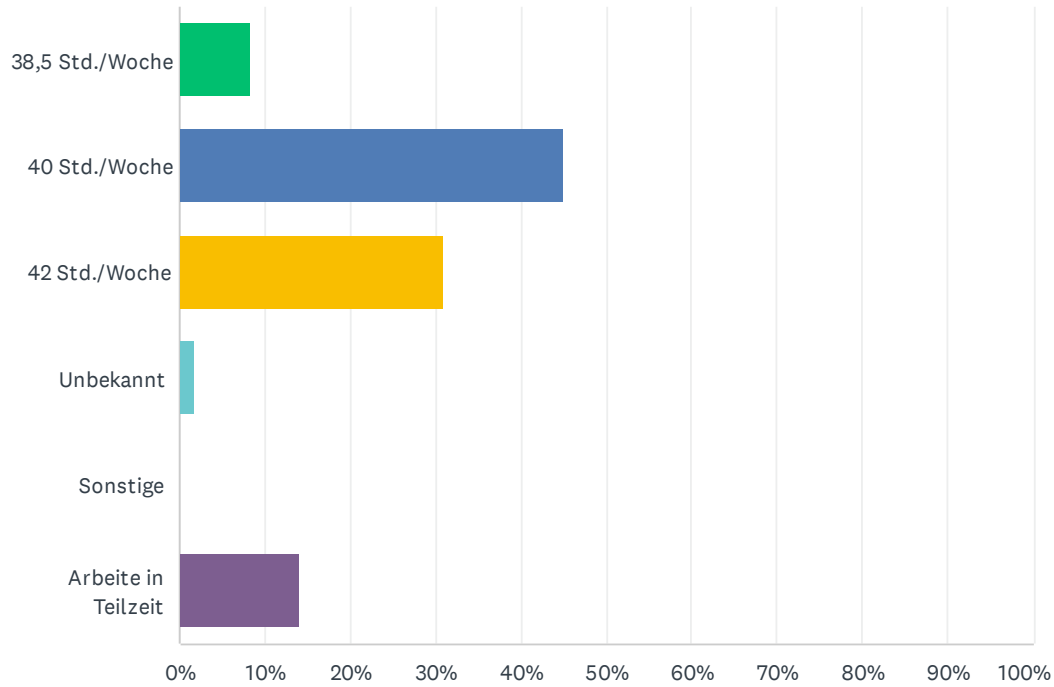

| ANTWORTOPTIONEN     | BEANTWORTUNGEN |            |
|---------------------|----------------|------------|
| 38,5 Std./Woche     | 8.33%          | 10         |
| 40 Std./Woche       | 45.00%         | 54         |
| 42 Std./Woche       | 30.83%         | 37         |
| Unbekannt           | 1.67%          | 2          |
| Sonstige            | 0.00%          | 0          |
| Arbeits in Teilzeit | 14.17%         | 17         |
| <b>GESAMT</b>       |                | <b>120</b> |

## F15 Wie hoch fallen Ihre durchschnittlichen wöchentlichen Arbeitsstunden aus (exkl. Dienste, inkl. Überstunden)?

Beantwortet: 120 Übersprungen: 2

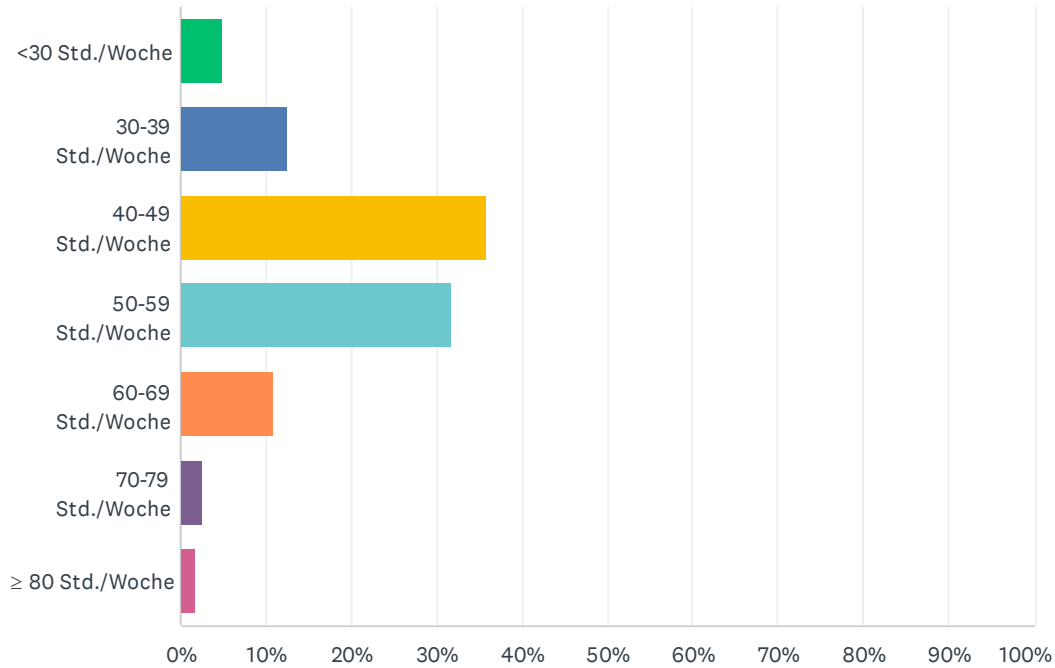

| ANTWORTOPTIONEN  | BEANTWORTUNGEN |            |
|------------------|----------------|------------|
| <30 Std./Woche   | 5.00%          | 6          |
| 30-39 Std./Woche | 12.50%         | 15         |
| 40-49 Std./Woche | 35.83%         | 43         |
| 50-59 Std./Woche | 31.67%         | 38         |
| 60-69 Std./Woche | 10.83%         | 13         |
| 70-79 Std./Woche | 2.50%          | 3          |
| ≥ 80 Std./Woche  | 1.67%          | 2          |
| <b>GESAMT</b>    |                | <b>120</b> |

## F16 Welche durchschnittliche Wochenarbeitszeit bevorzugen Sie?

Beantwortet: 119 Übersprungen: 3

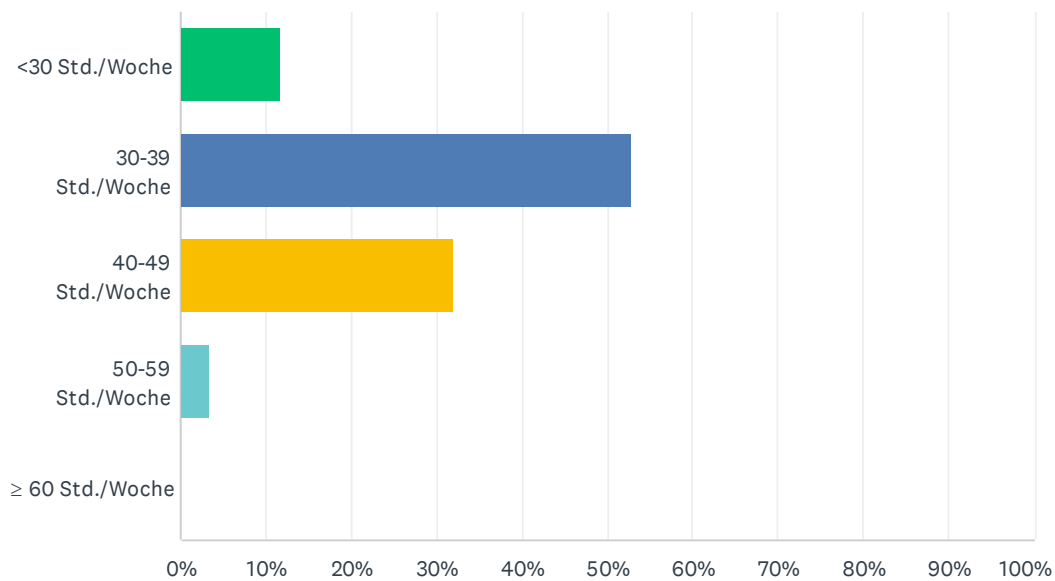

| ANTWORTOPTIONEN  | BEANTWORTUNGEN |            |
|------------------|----------------|------------|
| <30 Std./Woche   | 11.76%         | 14         |
| 30-39 Std./Woche | 52.94%         | 63         |
| 40-49 Std./Woche | 31.93%         | 38         |
| 50-59 Std./Woche | 3.36%          | 4          |
| ≥ 60 Std./Woche  | 0.00%          | 0          |
| <b>GESAMT</b>    |                | <b>119</b> |



## F17 Präferieren Sie flexible oder feste Arbeitszeiten?

Beantwortet: 119 Übersprungen: 3

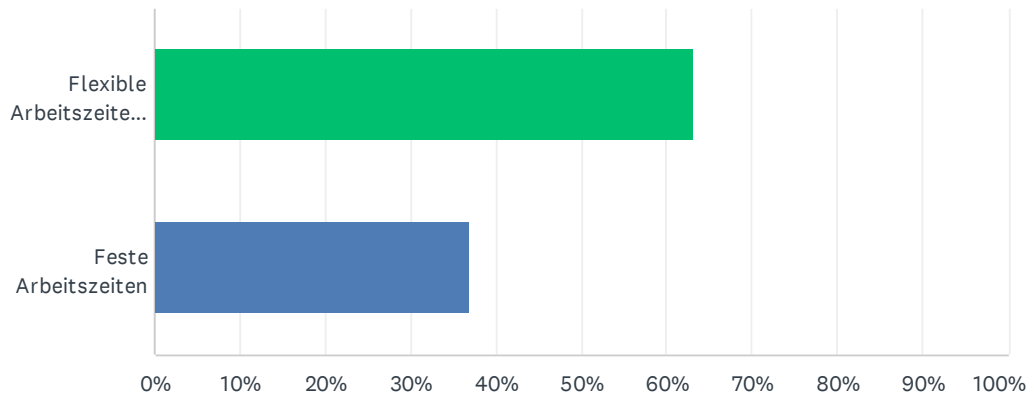

| ANTWORTOPTIONEN                         | BEANTWORTUNGEN |            |
|-----------------------------------------|----------------|------------|
| Flexible Arbeitszeiten (z.B. Gleitzeit) | 63.03%         | 75         |
| Feste Arbeitszeiten                     | 36.97%         | 44         |
| <b>GESAMT</b>                           |                | <b>119</b> |

## F18 Halten Sie Ihre vorgeschriebenen Arbeitspausen ein?

Beantwortet: 120 Übersprungen: 2

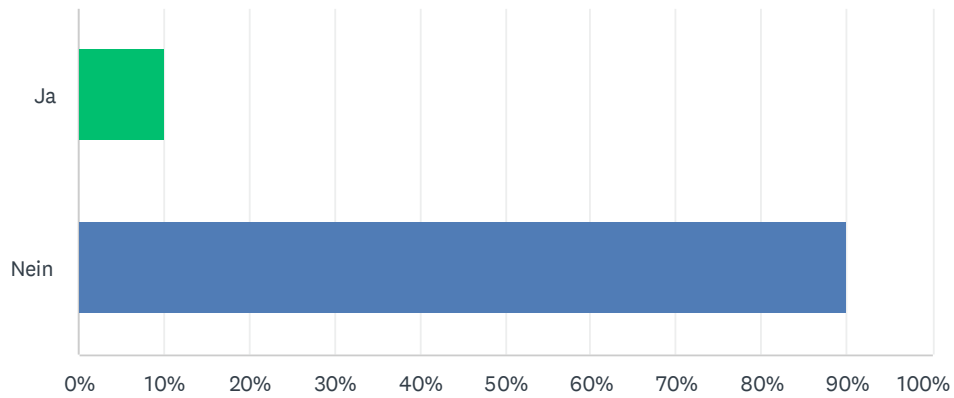

| ANTWORTOPTIONEN | BEANTWORTUNGEN |     |
|-----------------|----------------|-----|
| Ja              | 10.00%         | 12  |
| Nein            | 90.00%         | 108 |
| GESAMT          |                | 120 |

## F19 Verlassen Sie für die Arbeitspausen Ihren Arbeitsplatz?

Beantwortet: 12 Übersprungen: 110

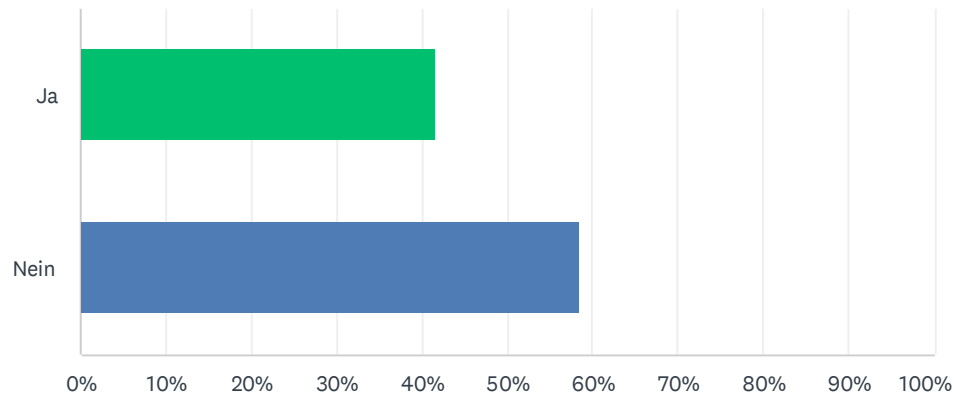

| ANTWORTOPTIONEN | BEANTWORTUNGEN |    |
|-----------------|----------------|----|
| Ja              | 41.67%         | 5  |
| Nein            | 58.33%         | 7  |
| GESAMT          |                | 12 |

## F20 Leisten Sie regelmäßig Überstunden?

Beantwortet: 119 Übersprungen: 3

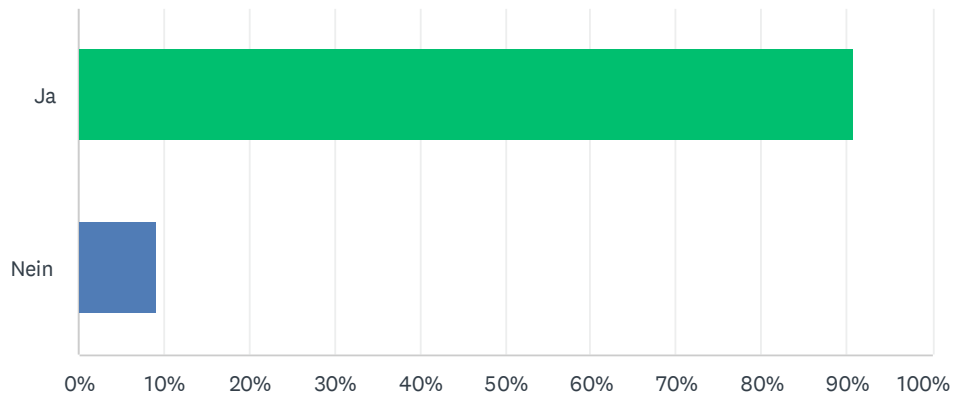

| ANTWORTOPTIONEN | BEANTWORTUNGEN |            |
|-----------------|----------------|------------|
| Ja              | 90.76%         | 108        |
| Nein            | 9.24%          | 11         |
| <b>GESAMT</b>   |                | <b>119</b> |

## F21 Wie hoch fallen Ihre durchschnittlichen wöchentlichen Überstunden aus?

Beantwortet: 119 Übersprungen: 3

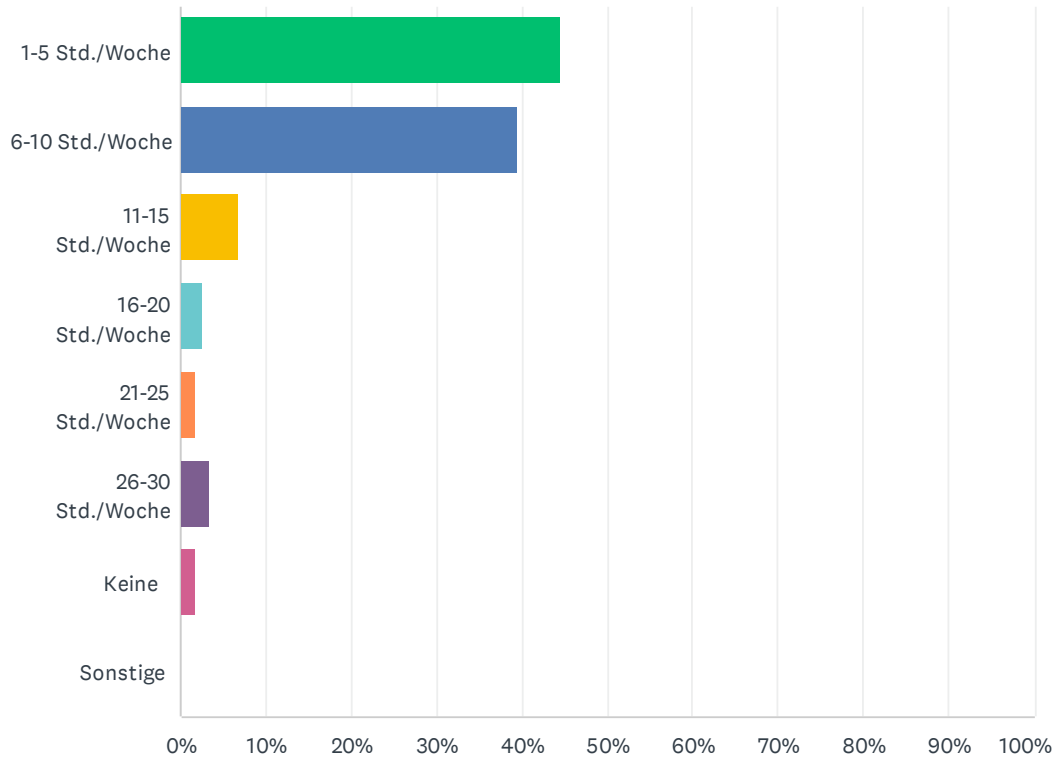

| ANTWORTOPTIONEN  | BEANTWORTUNGEN |            |
|------------------|----------------|------------|
| 1-5 Std./Woche   | 44.54%         | 53         |
| 6-10 Std./Woche  | 39.50%         | 47         |
| 11-15 Std./Woche | 6.72%          | 8          |
| 16-20 Std./Woche | 2.52%          | 3          |
| 21-25 Std./Woche | 1.68%          | 2          |
| 26-30 Std./Woche | 3.36%          | 4          |
| Keine            | 1.68%          | 2          |
| Sonstige         | 0.00%          | 0          |
| <b>GESAMT</b>    |                | <b>119</b> |

## F22 Was sind die Gründe der anfallenden Überstunden (Mehrfachnennung)?

Beantwortet: 119 Übersprungen: 3

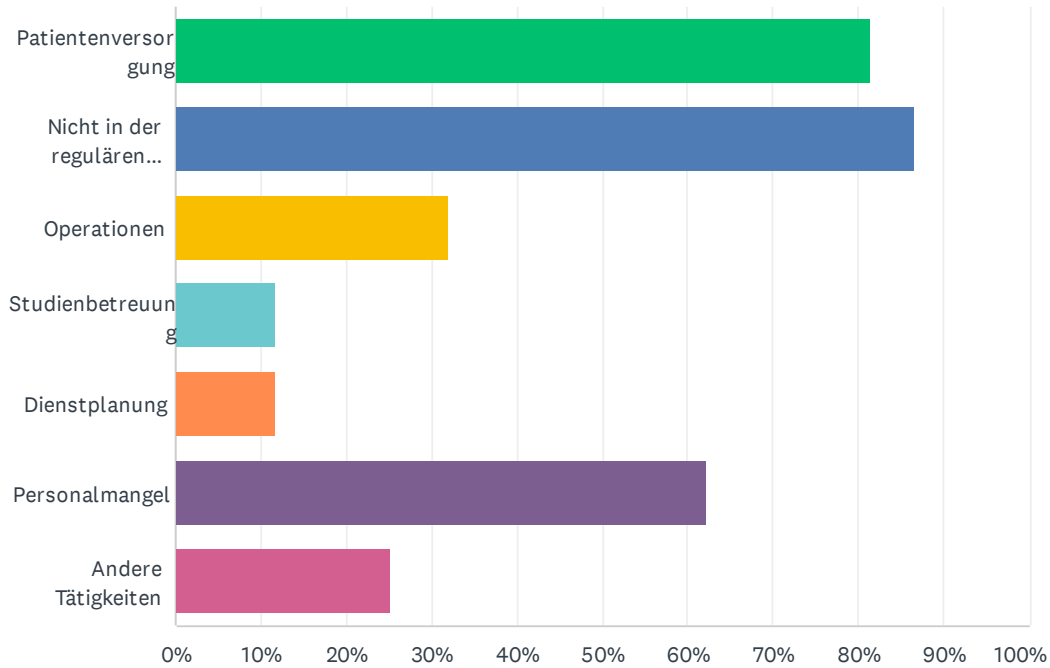

| ANTWORTOPTIONEN                                            | BEANTWORTUNGEN |     |
|------------------------------------------------------------|----------------|-----|
| Patientenversorgung                                        | 81.51%         | 97  |
| Nicht in der regulären Arbeitszeit erledigte Dokumentation | 86.55%         | 103 |
| Operationen                                                | 31.93%         | 38  |
| Studienbetreuung                                           | 11.76%         | 14  |
| Dienstplanung                                              | 11.76%         | 14  |
| Personalmangel                                             | 62.18%         | 74  |
| Andere Tätigkeiten                                         | 25.21%         | 30  |
| Befragte insgesamt: 119                                    |                |     |

## F23 Werden die geleisteten Überstunden explizit angeordnet?

Beantwortet: 119 Übersprungen: 3

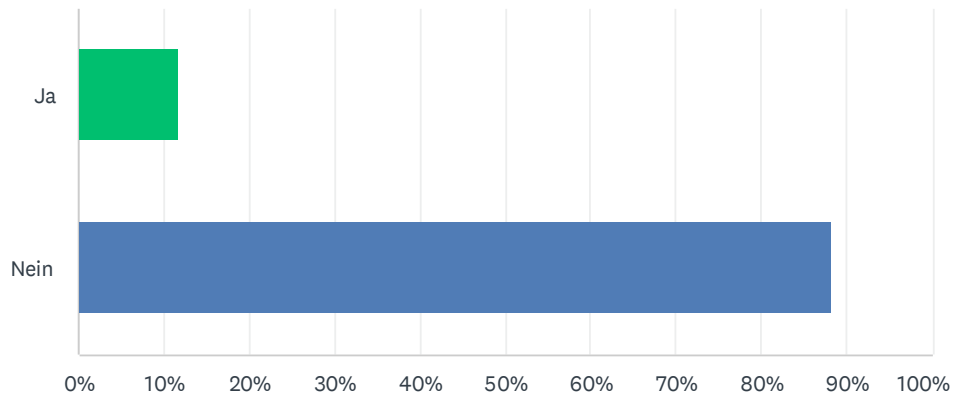

| ANTWORTOPTIONEN | BEANTWORTUNGEN |            |
|-----------------|----------------|------------|
| Ja              | 11.76%         | 14         |
| Nein            | 88.24%         | 105        |
| <b>GESAMT</b>   |                | <b>119</b> |

## F24 Besteht die Möglichkeit, sich Überstunden auszahlen zu lassen?

Beantwortet: 119 Übersprungen: 3

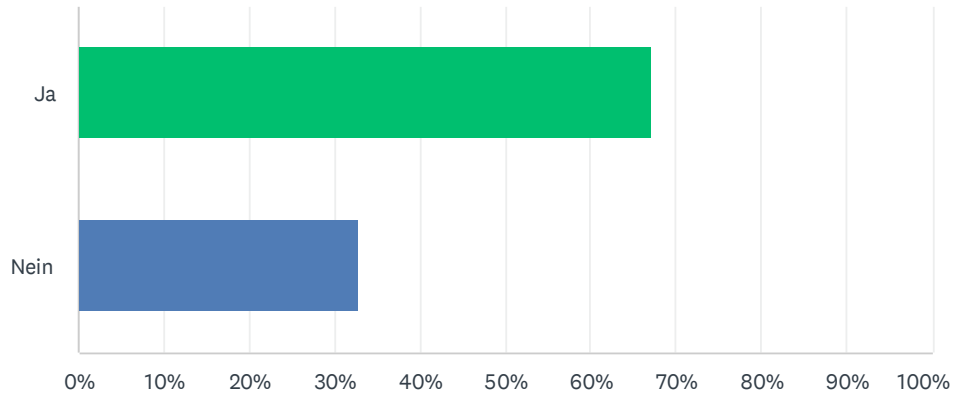

| ANTWORTOPTIONEN | BEANTWORTUNGEN |     |
|-----------------|----------------|-----|
| Ja              | 67.23%         | 80  |
| Nein            | 32.77%         | 39  |
| GESAMT          |                | 119 |



## F25 Besteht die Möglichkeit, für geleistete Überstunden Freizeitausgleich zu erhalten?

Beantwortet: 118 Übersprungen: 4

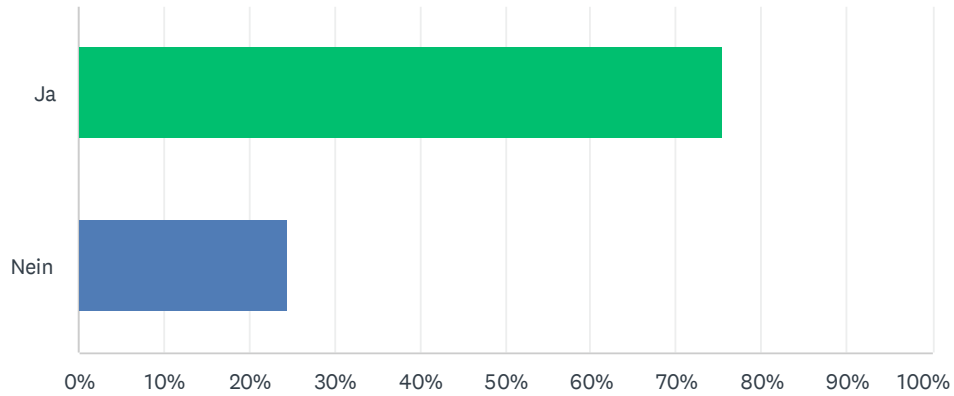

| ANTWORTOPTIONEN | BEANTWORTUNGEN |     |
|-----------------|----------------|-----|
| Ja              | 75.42%         | 89  |
| Nein            | 24.58%         | 29  |
| GESAMT          |                | 118 |

## F26 Besteht die Möglichkeit, nicht eingehaltene Pausen als Überstunden zu dokumentieren?

Beantwortet: 119 Übersprungen: 3

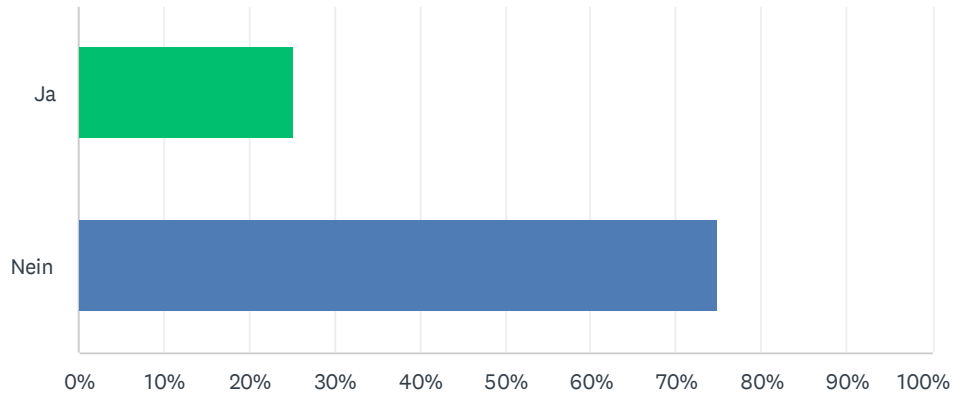

| ANTWORTOPTIONEN | BEANTWORTUNGEN |     |
|-----------------|----------------|-----|
| Ja              | 25.21%         | 30  |
| Nein            | 74.79%         | 89  |
| GESAMT          |                | 119 |

## F27 Wie hoch schätzen Sie den Anteil delegierbarer, nicht-ärztlicher Tätigkeiten ein?

Beantwortet: 119 Übersprungen: 3

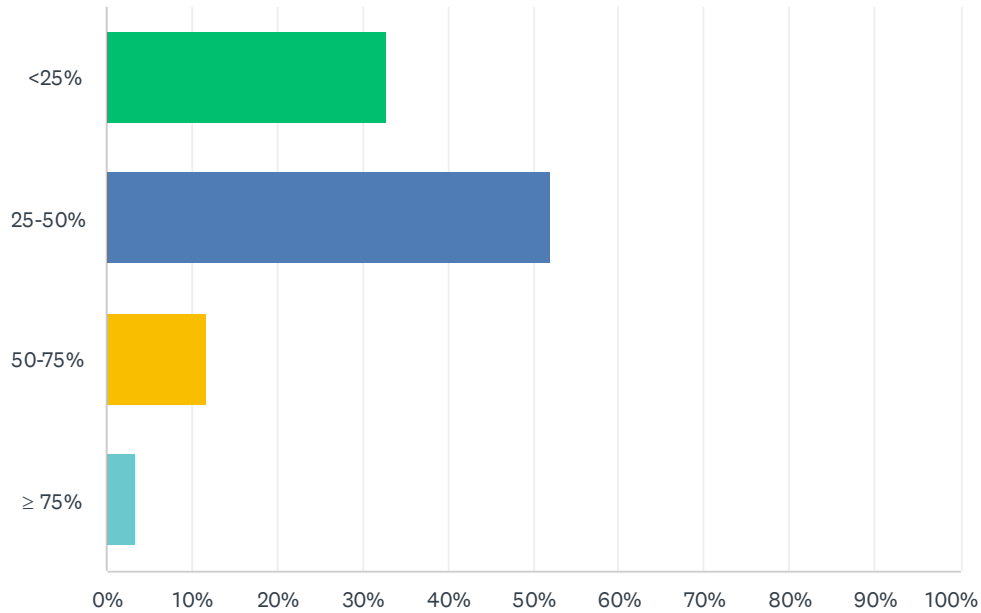

| ANTWORTOPTIONEN | BEANTWORTUNGEN |            |
|-----------------|----------------|------------|
| <25%            | 32.77%         | 39         |
| 25-50%          | 52.10%         | 62         |
| 50-75%          | 11.76%         | 14         |
| ≥ 75%           | 3.36%          | 4          |
| <b>GESAMT</b>   |                | <b>119</b> |

## F28 Wie groß schätzen Sie Ihren Anteil der Dokumentation in Bezug auf Ihre tägliche Arbeitszeit ein?

Beantwortet: 119 Übersprungen: 3

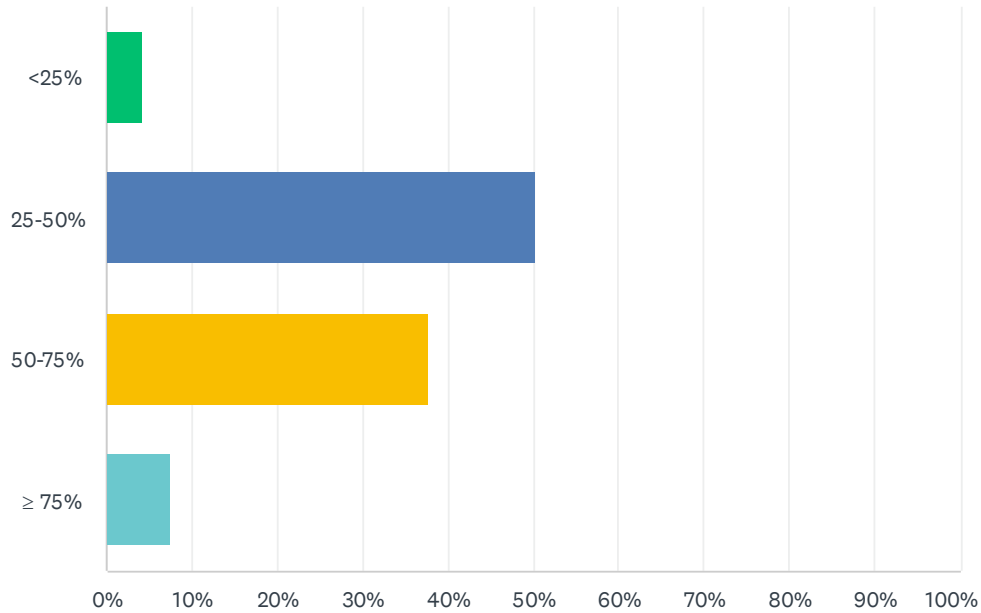

| ANTWORTOPTIONEN | BEANTWORTUNGEN |            |
|-----------------|----------------|------------|
| <25%            | 4.20%          | 5          |
| 25-50%          | 50.42%         | 60         |
| 50-75%          | 37.82%         | 45         |
| ≥ 75%           | 7.56%          | 9          |
| <b>GESAMT</b>   |                | <b>119</b> |

## F29 Wie zufrieden sind Sie mit dem Führungsstil Ihres Chefarztes?

Beantwortet: 119 Übersprungen: 3

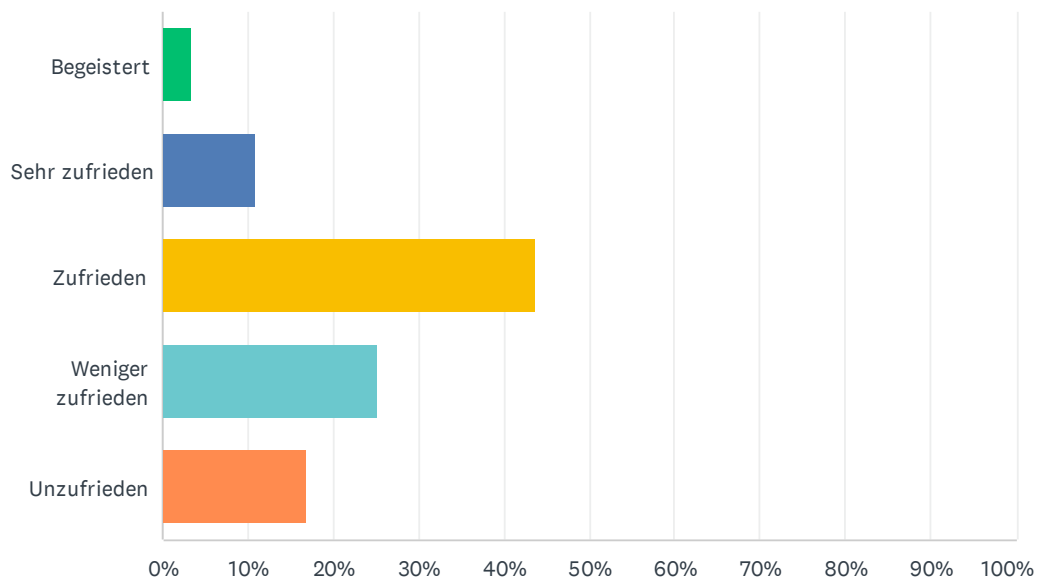

| ANTWORTOPTIONEN   | BEANTWORTUNGEN |            |
|-------------------|----------------|------------|
| Begeistert        | 3.36%          | 4          |
| Sehr zufrieden    | 10.92%         | 13         |
| Zufrieden         | 43.70%         | 52         |
| Weniger zufrieden | 25.21%         | 30         |
| Unzufrieden       | 16.81%         | 20         |
| <b>GESAMT</b>     |                | <b>119</b> |

## F30 Stellt Ihr Chefarzt für Sie eine Vorbildfunktion dar?

Beantwortet: 119 Übersprungen: 3

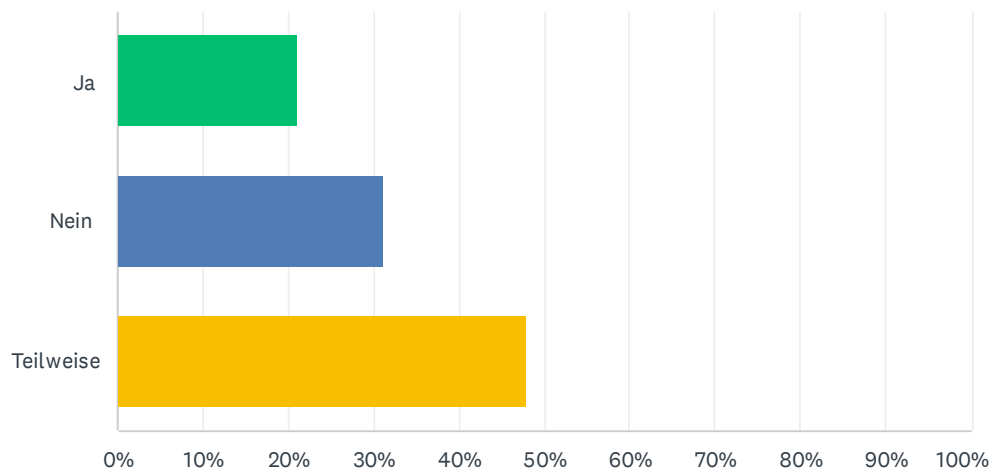

| ANTWORTOPTIONEN | BEANTWORTUNGEN |            |
|-----------------|----------------|------------|
| Ja              | 21.01%         | 25         |
| Nein            | 31.09%         | 37         |
| Teilweise       | 47.90%         | 57         |
| <b>GESAMT</b>   |                | <b>119</b> |

## F31 Stellen Ihre Oberärzte für Sie eine Vorbildfunktion dar?

Beantwortet: 119 Übersprungen: 3

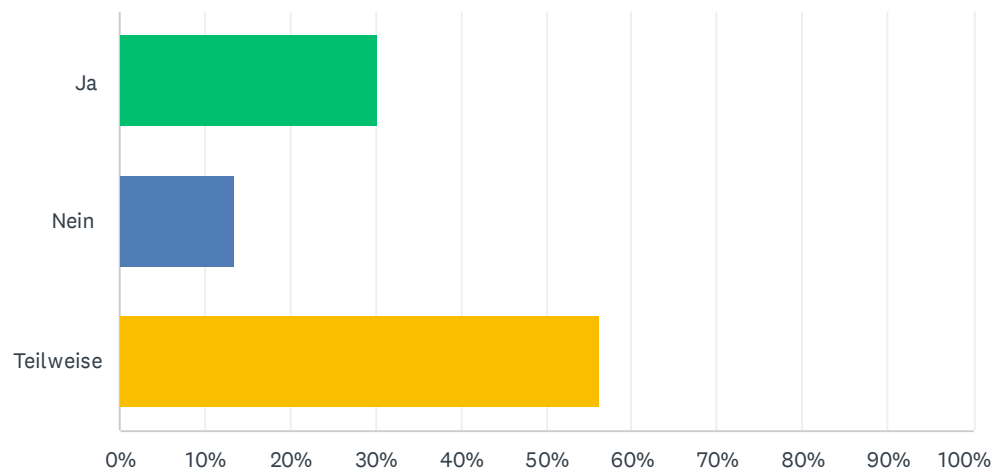

| ANTWORTOPTIONEN | BEANTWORTUNGEN |            |
|-----------------|----------------|------------|
| Ja              | 30.25%         | 36         |
| Nein            | 13.45%         | 16         |
| Teilweise       | 56.30%         | 67         |
| <b>GESAMT</b>   |                | <b>119</b> |

## F32 Finden regelmäßige Chefarztvisiten statt?

Beantwortet: 119 Übersprungen: 3

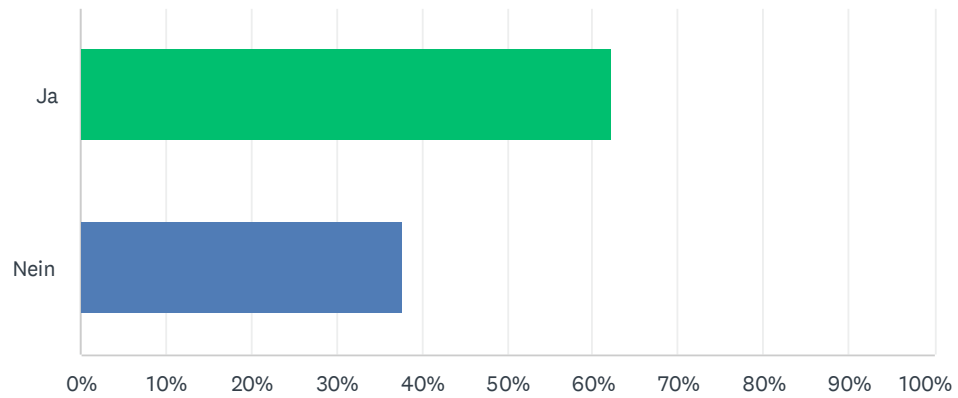

| ANTWORTOPTIONEN | BEANTWORTUNGEN |     |
|-----------------|----------------|-----|
| Ja              | 62.18%         | 74  |
| Nein            | 37.82%         | 45  |
| GESAMT          |                | 119 |



## F33 Finden regelmäßige Oberarztvisiten am Patientenbett statt?

Beantwortet: 119 Übersprungen: 3

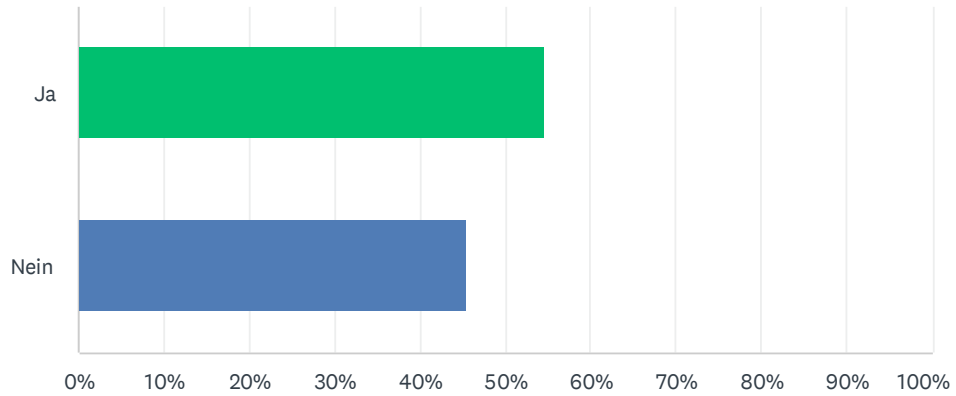

| ANTWORTOPTIONEN | BEANTWORTUNGEN |     |
|-----------------|----------------|-----|
| Ja              | 54.62%         | 65  |
| Nein            | 45.38%         | 54  |
| GESAMT          |                | 119 |

## F34 Wünschen Sie sich regelmäßige Oberarzt- bzw. Chefarztvisiten?

Beantwortet: 119 Übersprungen: 3

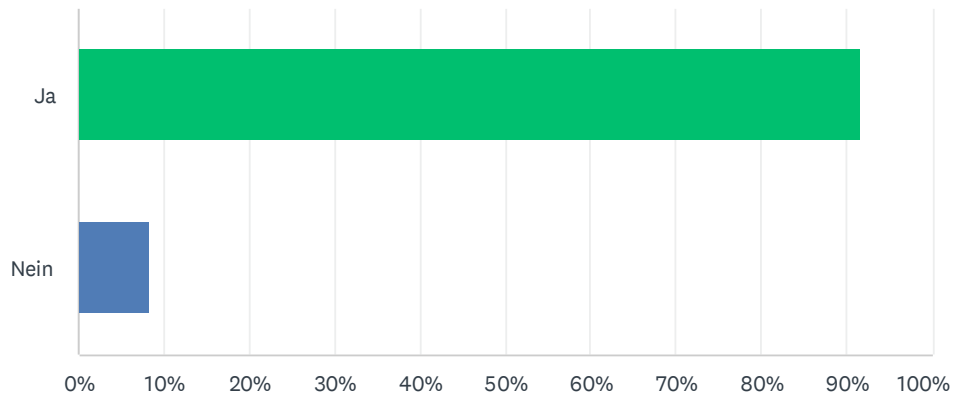

| ANTWORTOPTIONEN | BEANTWORTUNGEN |     |
|-----------------|----------------|-----|
| Ja              | 91.60%         | 109 |
| Nein            | 8.40%          | 10  |
| GESAMT          |                | 119 |

## F35 Wie schätzen Sie den Stellenwert einer Promotion ein?

Beantwortet: 119 Übersprungen: 3

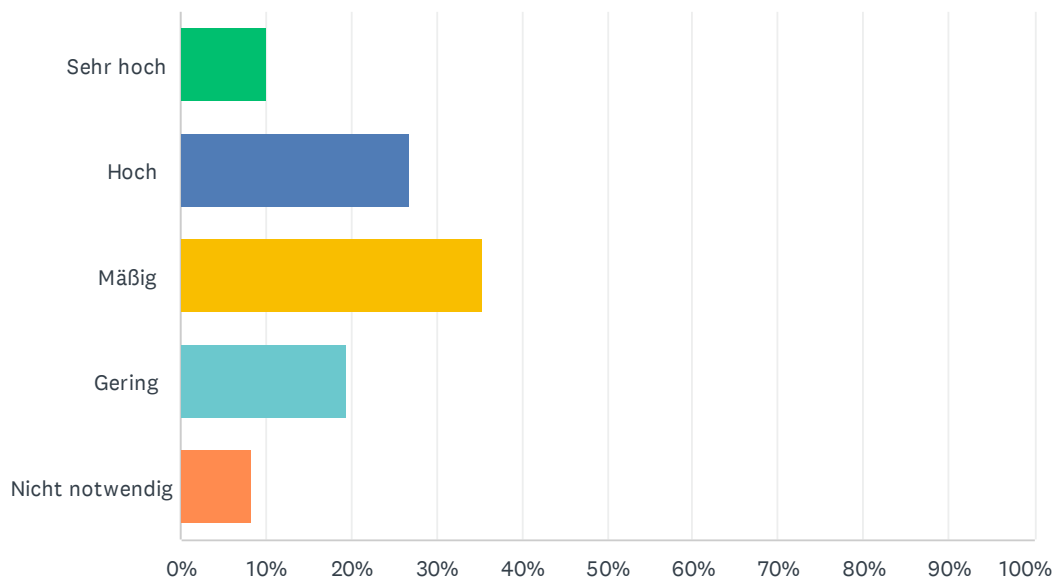

| ANTWORTOPTIONEN | BEANTWORTUNGEN |            |
|-----------------|----------------|------------|
| Sehr hoch       | 10.08%         | 12         |
| Hoch            | 26.89%         | 32         |
| Mäßig           | 35.29%         | 42         |
| Gering          | 19.33%         | 23         |
| Nicht notwendig | 8.40%          | 10         |
| <b>GESAMT</b>   |                | <b>119</b> |

## F36 Wie schätzen Sie den Stellenwert des wissenschaftlichen Arbeitens ein?

Beantwortet: 116 Übersprungen: 6

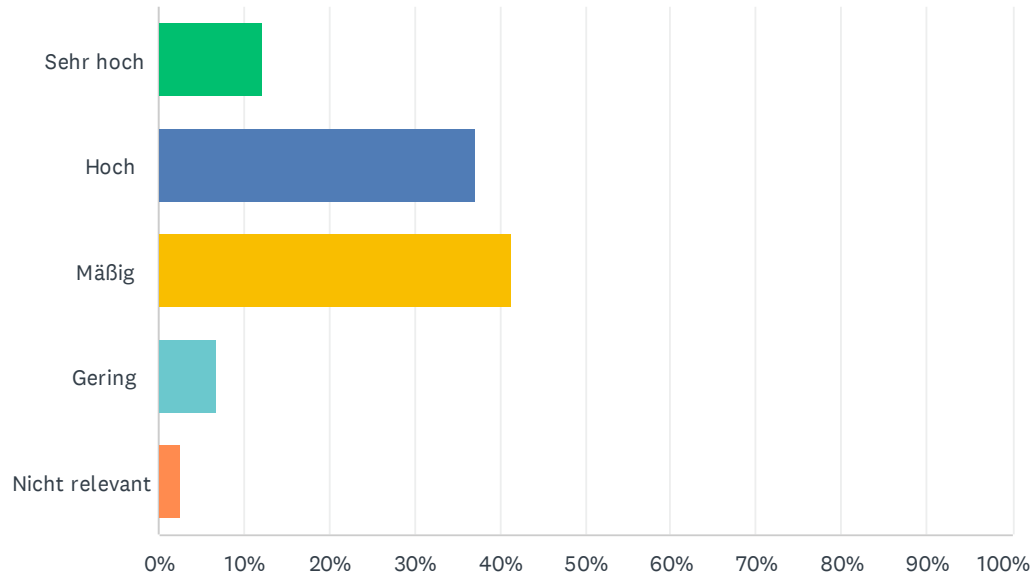

| ANTWORTOPTIONEN | BEANTWORTUNGEN |            |
|-----------------|----------------|------------|
| Sehr hoch       | 12.07%         | 14         |
| Hoch            | 37.07%         | 43         |
| Mäßig           | 41.38%         | 48         |
| Gering          | 6.90%          | 8          |
| Nicht relevant  | 2.59%          | 3          |
| <b>GESAMT</b>   |                | <b>116</b> |

## F37 Erhalten Sie an Ihrer Klinik ausreichend Freiraum, wissenschaftlich tätig zu werden?

Beantwortet: 119 Übersprungen: 3

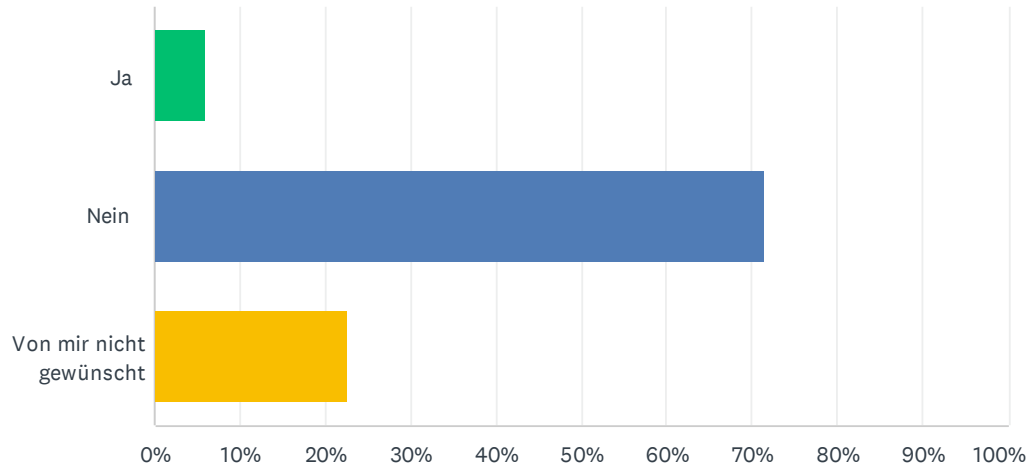

| ANTWORTOPTIONEN         | BEANTWORTUNGEN |            |
|-------------------------|----------------|------------|
| Ja                      | 5.88%          | 7          |
| Nein                    | 71.43%         | 85         |
| Von mir nicht gewünscht | 22.69%         | 27         |
| <b>GESAMT</b>           |                | <b>119</b> |

## F38 Fühlen Sie sich als Arzt in Weiterbildung mit der durch Sie erbrachten Arbeit in Ihrer Klinik wertgeschätzt?

Beantwortet: 118 Übersprungen: 4

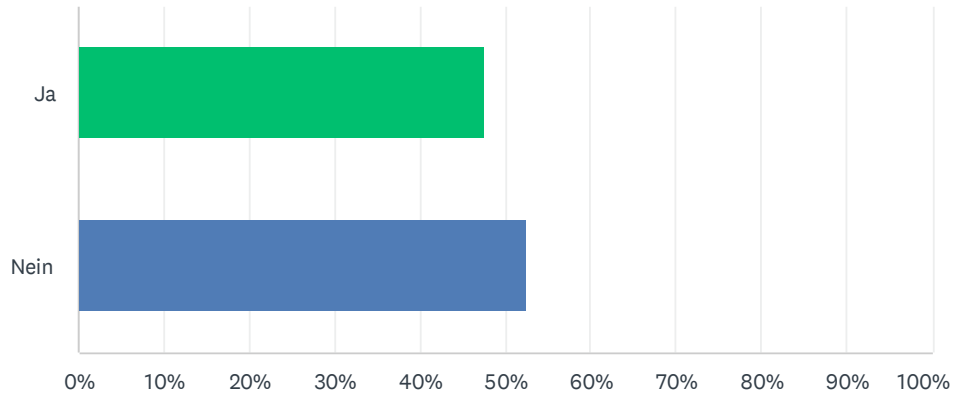

| ANTWORTOPTIONEN | BEANTWORTUNGEN |     |
|-----------------|----------------|-----|
| Ja              | 47.46%         | 56  |
| Nein            | 52.54%         | 62  |
| GESAMT          |                | 118 |

## F39 Streben Sie im Verlauf eine Klinikanstellung oder eine spätere Niederlassung an?

Beantwortet: 119 Übersprungen: 3

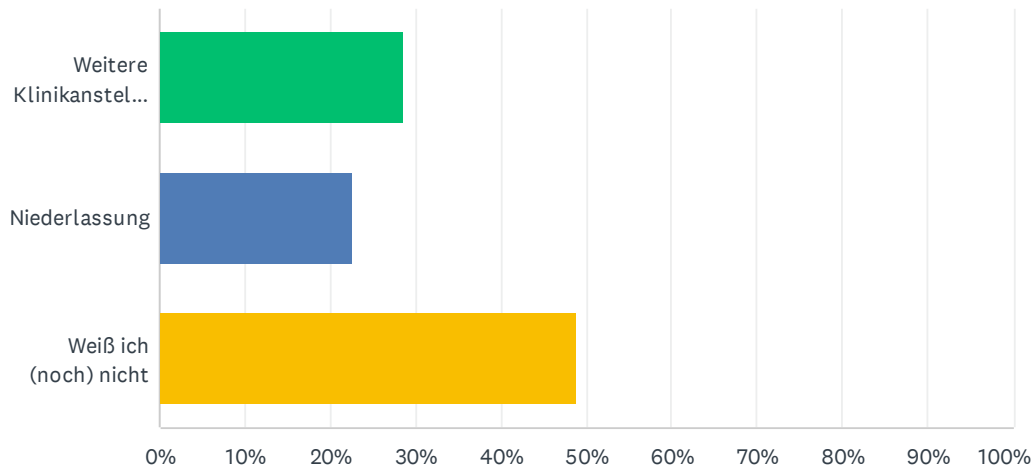

| ANTWORTOPTIONEN          | BEANTWORTUNGEN |            |
|--------------------------|----------------|------------|
| Weitere Klinikanstellung | 28.57%         | 34         |
| Niederlassung            | 22.69%         | 27         |
| Weiß ich (noch) nicht    | 48.74%         | 58         |
| <b>GESAMT</b>            |                | <b>119</b> |

## F40 Sind Sie zufrieden mit Ihrer aktuellen beruflichen Situation?

Beantwortet: 119 Übersprungen: 3

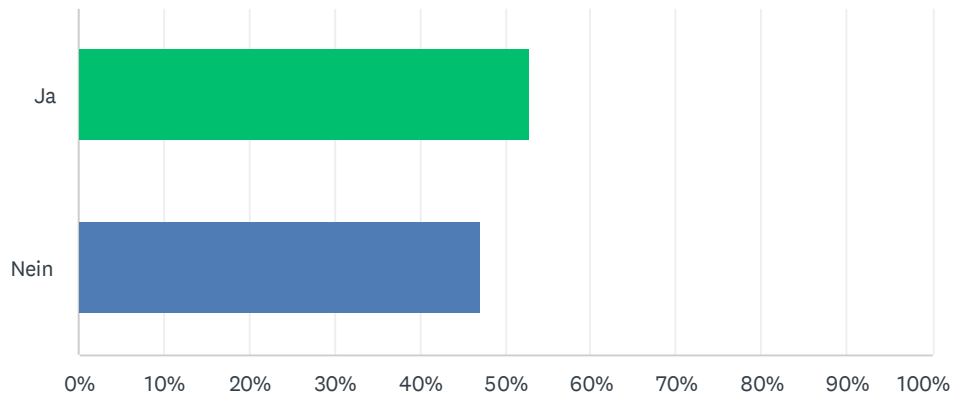

| ANTWORTOPTIONEN | BEANTWORTUNGEN |     |
|-----------------|----------------|-----|
| Ja              | 52.94%         | 63  |
| Nein            | 47.06%         | 56  |
| GESAMT          |                | 119 |



## F41 Nennen Sie, bei Unzufriedenheit, einen bzw. mehrere Gründe, die zu dieser Unzufriedenheit beitragen:

Beantwortet: 56 Übersprungen: 66

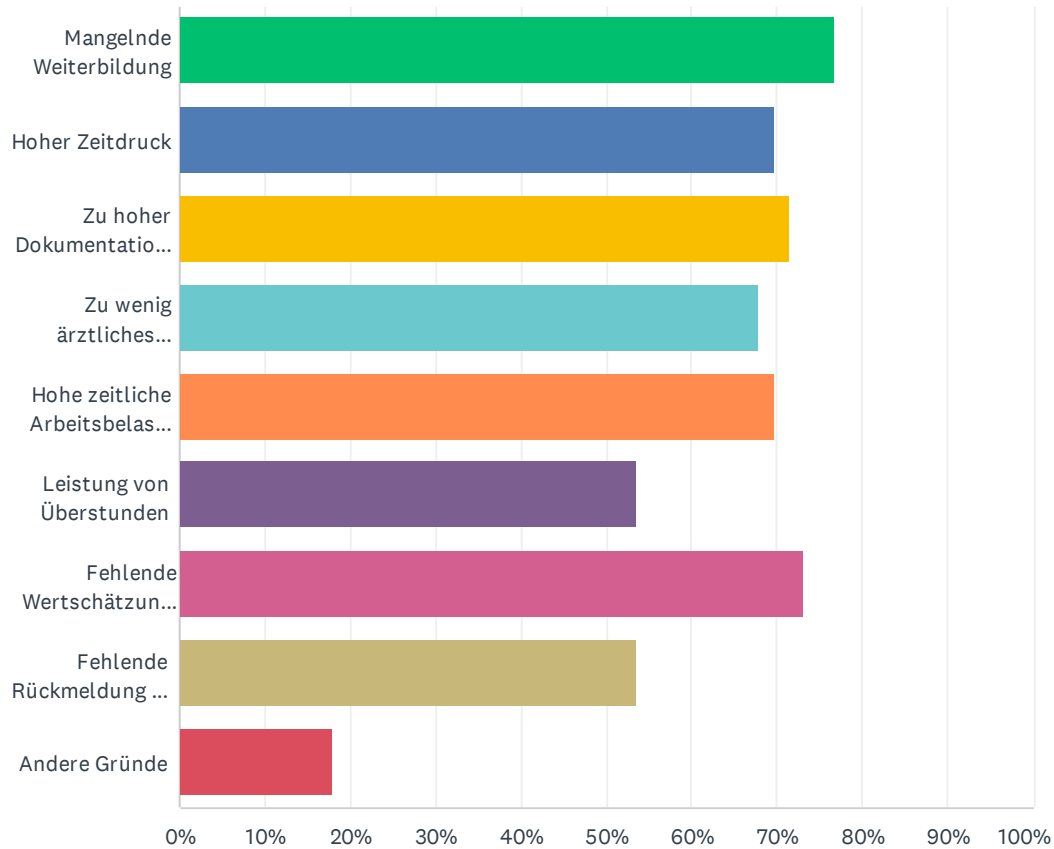

| ANTWORTOPTIONEN                                                               | BEANTWORTUNGEN |    |
|-------------------------------------------------------------------------------|----------------|----|
| Mangelnde Weiterbildung                                                       | 76.79%         | 43 |
| Hoher Zeitdruck                                                               | 69.64%         | 39 |
| Zu hoher Dokumentationsaufwand                                                | 71.43%         | 40 |
| Zu wenig ärztliches Personal in Relation zur Arbeit                           | 67.86%         | 38 |
| Hohe zeitliche Arbeitsbelastung                                               | 69.64%         | 39 |
| Leistung von Überstunden                                                      | 53.57%         | 30 |
| Fehlende Wertschätzung der eigenen Arbeit                                     | 73.21%         | 41 |
| Fehlende Rückmeldung der weiterbildenden Ärzte zur erbrachten Arbeitsleistung | 53.57%         | 30 |
| Andere Gründe                                                                 | 17.86%         | 10 |
| Befragte insgesamt: 56                                                        |                |    |

## F42 Wie würden Sie die kollegiale Zusammenarbeit bewerten?

Beantwortet: 117 Übersprungen: 5

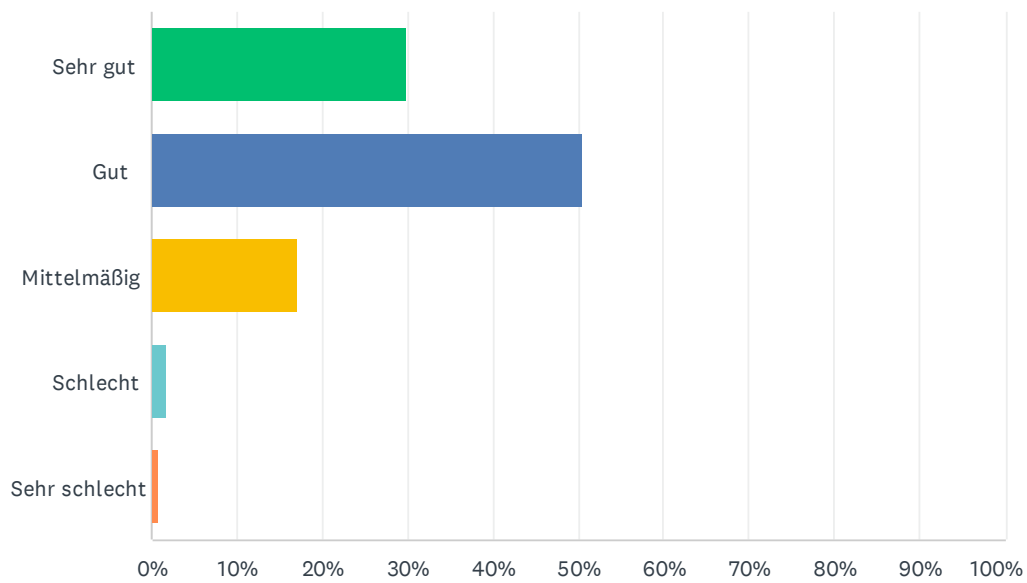

| ANTWORTOPTIONEN | BEANTWORTUNGEN |            |
|-----------------|----------------|------------|
| Sehr gut        | 29.91%         | 35         |
| Gut             | 50.43%         | 59         |
| Mittelmäßig     | 17.09%         | 20         |
| Schlecht        | 1.71%          | 2          |
| Sehr schlecht   | 0.85%          | 1          |
| <b>GESAMT</b>   |                | <b>117</b> |

## F43 Leidet Ihre kollegiale Zusammenarbeit unter der Arbeitsbelastung?

Beantwortet: 118 Übersprungen: 4

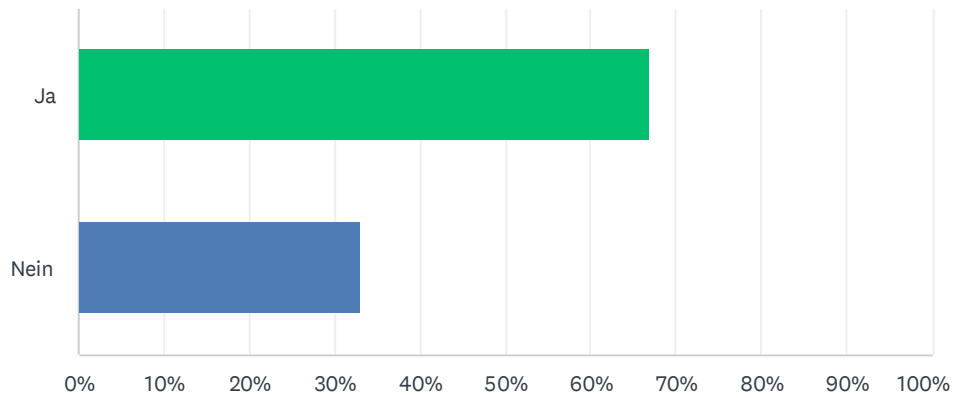

| ANTWORTOPTIONEN | BEANTWORTUNGEN |     |
|-----------------|----------------|-----|
| Ja              | 66.95%         | 79  |
| Nein            | 33.05%         | 39  |
| GESAMT          |                | 118 |

## F44 Wie beurteilen Sie die an Ihrer Klinik vorhandene Weiterbildung?

Beantwortet: 118 Übersprungen: 4

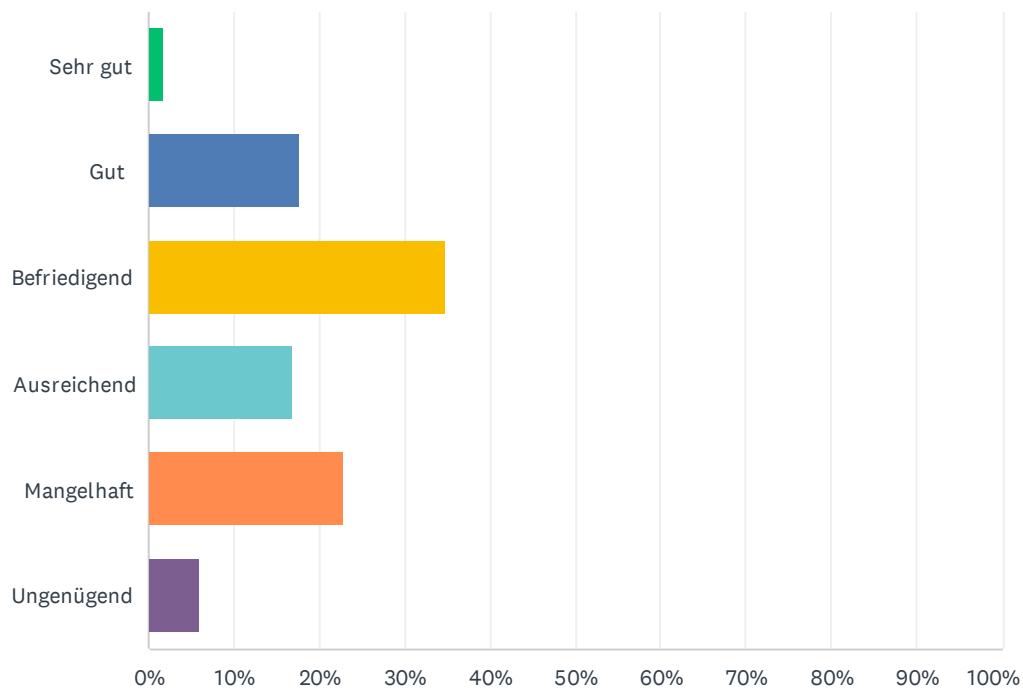

| ANTWORTOPTIONEN | BEANTWORTUNGEN |
|-----------------|----------------|
| Sehr gut        | 1.69% 2        |
| Gut             | 17.80% 21      |
| Befriedigend    | 34.75% 41      |
| Ausreichend     | 16.95% 20      |
| Mangelhaft      | 22.88% 27      |
| Ungenügend      | 5.93% 7        |
| <b>GESAMT</b>   | <b>118</b>     |

## F45 Gibt es einen strukturierten Weiterbildungsplan?

Beantwortet: 118 Übersprungen: 4

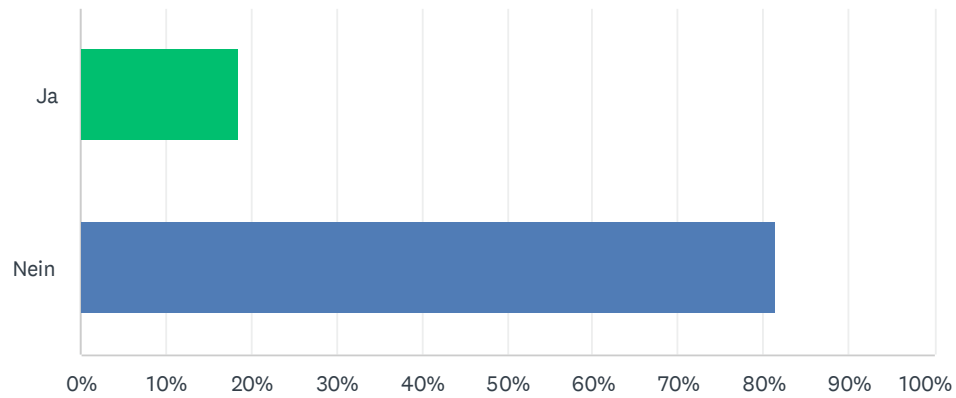

| ANTWORTOPTIONEN | BEANTWORTUNGEN |     |
|-----------------|----------------|-----|
| Ja              | 18.64%         | 22  |
| Nein            | 81.36%         | 96  |
| GESAMT          |                | 118 |

## F46 Wird der strukturierte Weiterbildungsplan zuverlässig eingehalten?

Beantwortet: 38 Übersprungen: 84

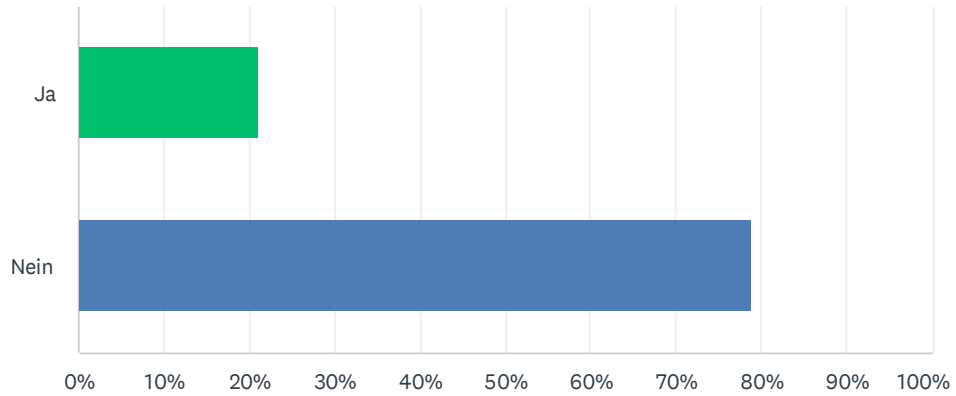

| ANTWORTOPTIONEN | BEANTWORTUNGEN |    |
|-----------------|----------------|----|
| Ja              | 21.05%         | 8  |
| Nein            | 78.95%         | 30 |
| GESAMT          |                | 38 |

F47 Haben Sie den Eindruck, dass Sie die Fähigkeiten, die Sie während Ihrer bisher absolvierten Weiterbildungszeit erlernt haben, in gleicher Weise auch in kürzerer Zeit oder sogar effektiver hätten erlernen können?

Beantwortet: 118 Übersprungen: 4

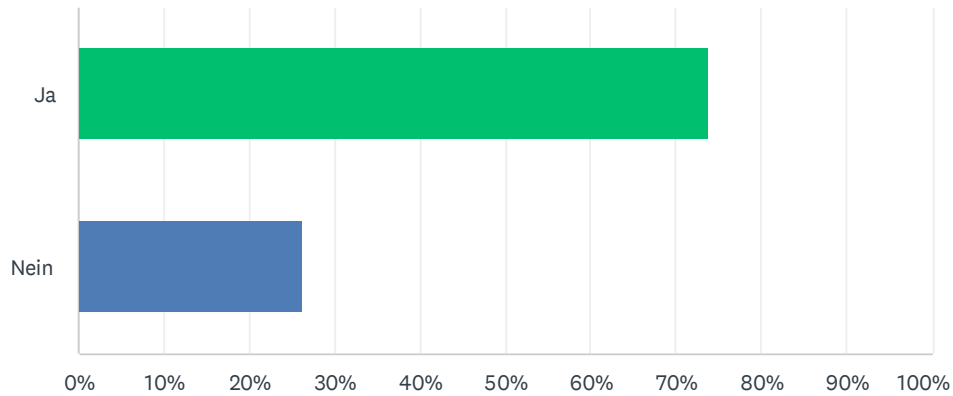

| ANTWORTOPTIONEN | BEANTWORTUNGEN |     |
|-----------------|----------------|-----|
| Ja              | 73.73%         | 87  |
| Nein            | 26.27%         | 31  |
| GESAMT          |                | 118 |

## F48 Sind externe Fortbildungen notwendig, um den Facharztstandard bis zum Ende der Weiterbildung zu erlangen?

Beantwortet: 118 Übersprungen: 4

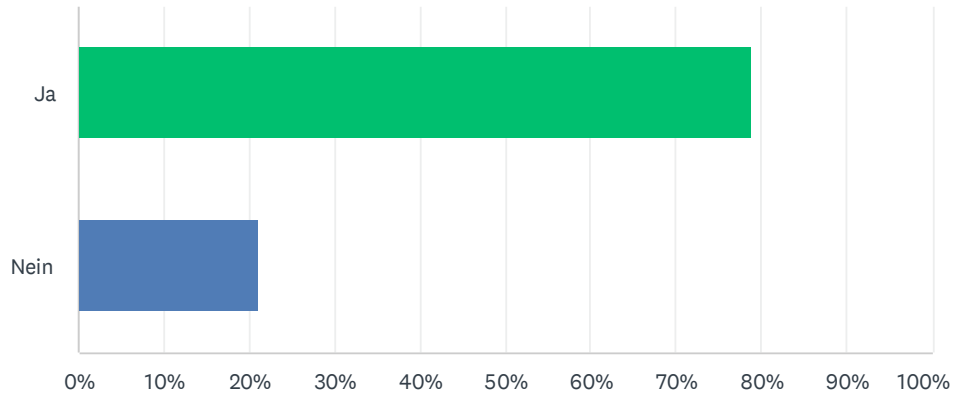

| ANTWORTOPTIONEN | BEANTWORTUNGEN |     |
|-----------------|----------------|-----|
| Ja              | 78.81%         | 93  |
| Nein            | 21.19%         | 25  |
| GESAMT          |                | 118 |



## F49 Erhalten Sie finanzielle Zuschüsse zu externen Fortbildungen?

Beantwortet: 118 Übersprungen: 4

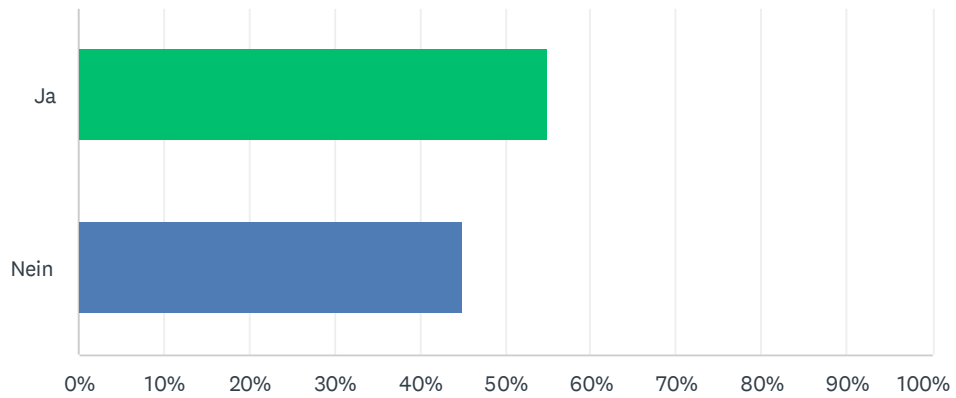

| ANTWORTOPTIONEN | BEANTWORTUNGEN |     |
|-----------------|----------------|-----|
| Ja              | 55.08%         | 65  |
| Nein            | 44.92%         | 53  |
| GESAMT          |                | 118 |

F50 Gibt es ein Oberarzt-Mentoren-Programm<sup>1</sup> an Ihrer Klinik?<sup>1</sup> Ein Oberarzt betreut junge Kollegen (max. 2-3) und ist erster Ansprechpartner beispielsweise in Fragen der Ausbildung.

Beantwortet: 118 Übersprungen: 4

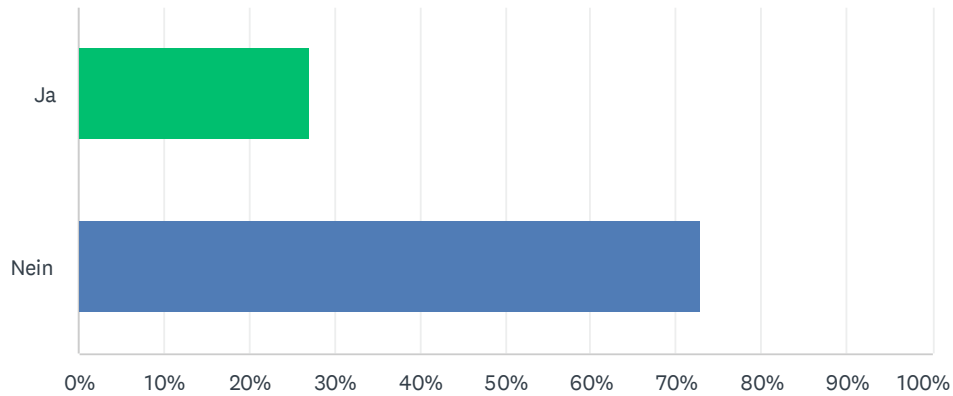

| ANTWORTOPTIONEN | BEANTWORTUNGEN |     |
|-----------------|----------------|-----|
| Ja              | 27.12%         | 32  |
| Nein            | 72.88%         | 86  |
| GESAMT          |                | 118 |

## F51 Finden regelmäßige Weiterbildungsgespräche, wie gefordert, ein Mal jährlich statt?

Beantwortet: 118 Übersprungen: 4

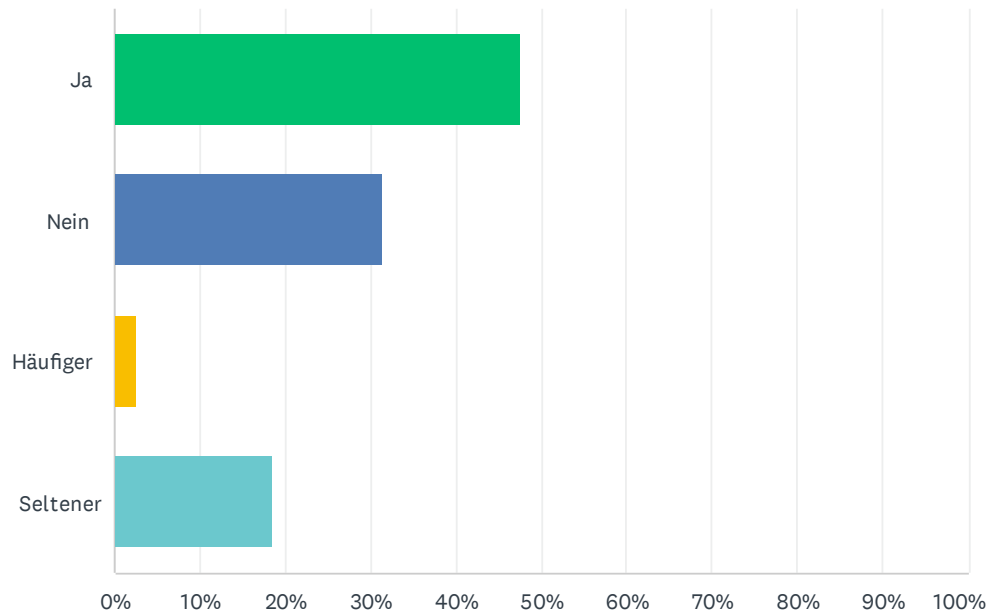

| ANTWORTOPTIONEN | BEANTWORTUNGEN |            |
|-----------------|----------------|------------|
| Ja              | 47.46%         | 56         |
| Nein            | 31.36%         | 37         |
| Häufiger        | 2.54%          | 3          |
| Seltener        | 18.64%         | 22         |
| <b>GESAMT</b>   |                | <b>118</b> |

## F52 Empfinden Sie die Weiterbildungsgespräche als konstruktiv?

Beantwortet: 115 Übersprungen: 7

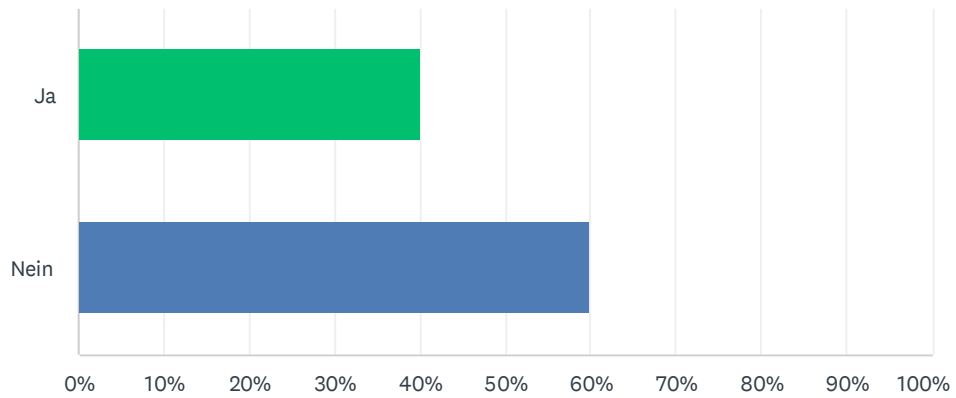

| ANTWORTOPTIONEN | BEANTWORTUNGEN |     |
|-----------------|----------------|-----|
| Ja              | 40.00%         | 46  |
| Nein            | 60.00%         | 69  |
| GESAMT          |                | 115 |

## F53 Werden Studenten gegenüber Ärzten in Weiterbildung in Ihrer Klinik im OP bevorzugt als 1. Assistenz eingesetzt?

Beantwortet: 118 Übersprungen: 4

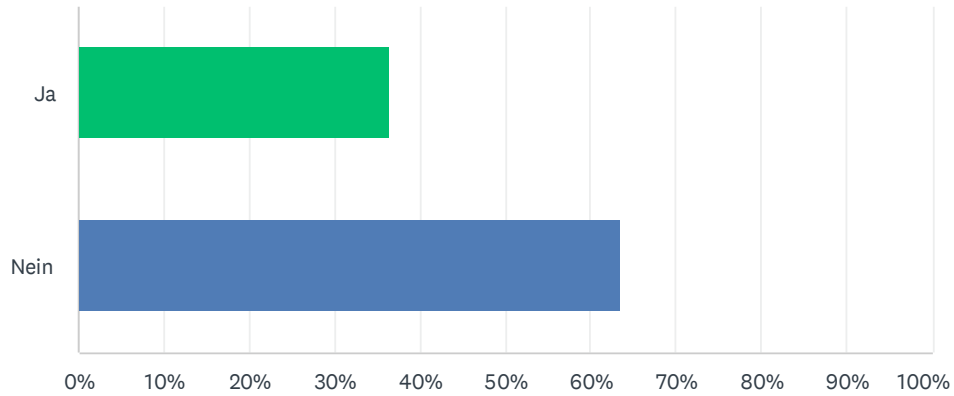

| ANTWORTOPTIONEN | BEANTWORTUNGEN |     |
|-----------------|----------------|-----|
| Ja              | 36.44%         | 43  |
| Nein            | 63.56%         | 75  |
| GESAMT          |                | 118 |

F54 Tendieren Sie eher zu einer Work-Life-Balance<sup>1</sup> oder zu einer Work-Life-Separation<sup>2</sup>?  
<sup>1</sup> Work-Life-Balance: Flexibler bzw. fließender Übergang zwischen Privat- und Berufsleben  
<sup>2</sup> Work-Life-Separation: Klare Trennung zwischen Privat- und Berufsleben

Beantwortet: 118 Übersprungen: 4

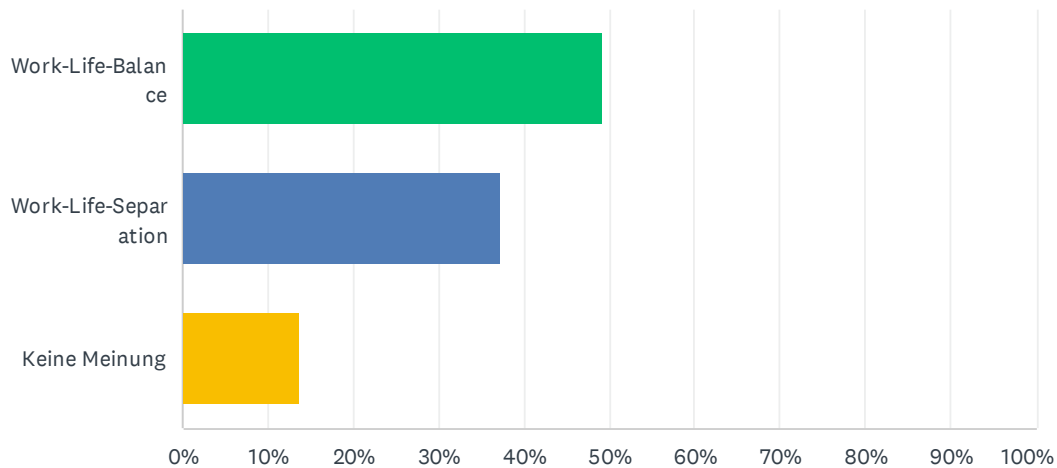

| ANTWORTOPTIONEN      | BEANTWORTUNGEN |            |
|----------------------|----------------|------------|
| Work-Life-Balance    | 49.15%         | 58         |
| Work-Life-Separation | 37.29%         | 44         |
| Keine Meinung        | 13.56%         | 16         |
| <b>GESAMT</b>        |                | <b>118</b> |

## F55 Welchen Stellenwert nimmt Ihre Gesundheit für Sie gegenüber dem Berufsalltag ein?

Beantwortet: 117 Übersprungen: 5

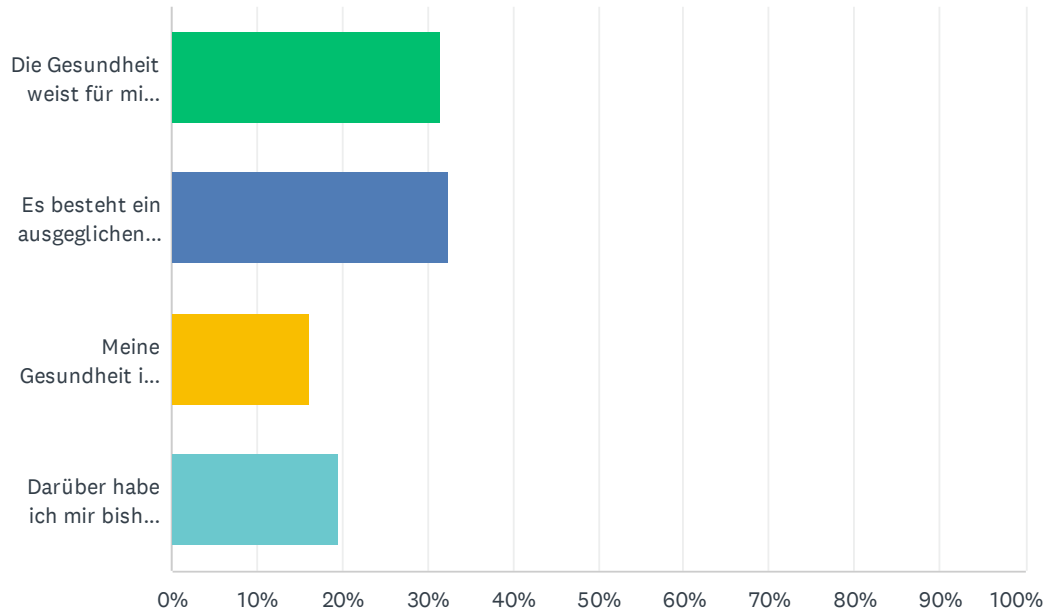

| ANTWORTOPTIONEN                                                                                                                              | BEANTWORTUNGEN |            |
|----------------------------------------------------------------------------------------------------------------------------------------------|----------------|------------|
| Die Gesundheit weist für mich gegenüber des Berufs nach dem Grundsatz „Gesunde Ärzte für gesunde Patienten“ eine übergeordnete Bedeutung auf | 31.62%         | 37         |
| Es besteht ein ausgeglichenes Verhältnis zwischen meiner Gesundheit und meinem Beruf                                                         | 32.48%         | 38         |
| Meine Gesundheit ist für mich von untergeordneter Bedeutung                                                                                  | 16.24%         | 19         |
| Darüber habe ich mir bisher noch keine Gedanken gemacht                                                                                      | 19.66%         | 23         |
| <b>GESAMT</b>                                                                                                                                |                | <b>117</b> |

## F56 Haben Sie den Eindruck, dass die „Hemmschwelle“, sich krank zu melden, unter der zunehmenden Arbeitsbelastung sinkt?

Beantwortet: 118 Übersprungen: 4

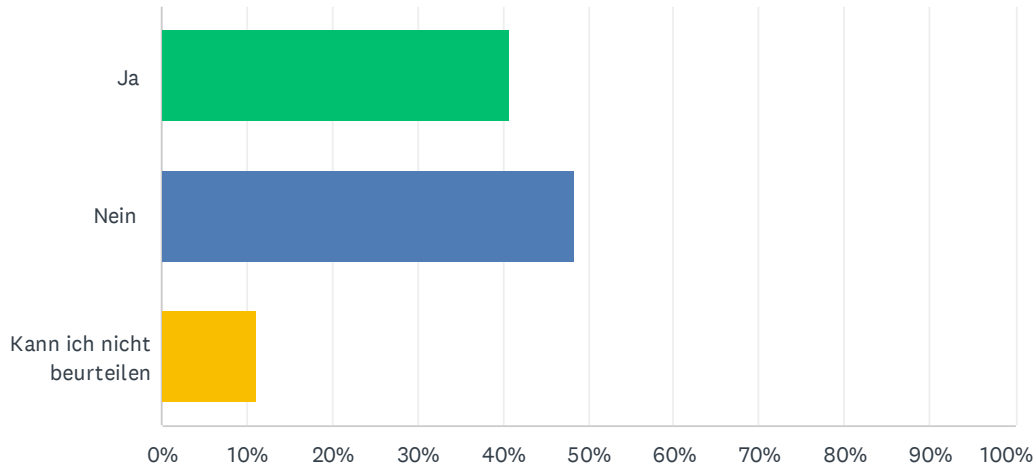

| ANTWORTOPTIONEN           | BEANTWORTUNGEN |            |
|---------------------------|----------------|------------|
| Ja                        | 40.68%         | 48         |
| Nein                      | 48.31%         | 57         |
| Kann ich nicht beurteilen | 11.02%         | 13         |
| <b>GESAMT</b>             |                | <b>118</b> |



## F57 Wie viele Krankheitstage hatten Sie im vergangenen Jahr?

Beantwortet: 116 Übersprungen: 6

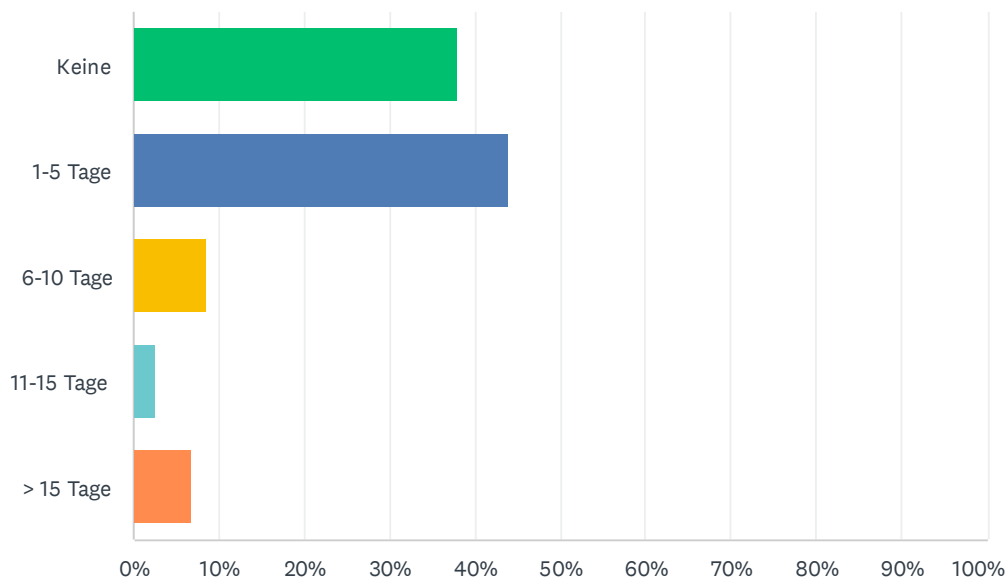

| ANTWORTOPTIONEN | BEANTWORTUNGEN |            |
|-----------------|----------------|------------|
| Keine           | 37.93%         | 44         |
| 1-5 Tage        | 43.97%         | 51         |
| 6-10 Tage       | 8.62%          | 10         |
| 11-15 Tage      | 2.59%          | 3          |
| > 15 Tage       | 6.90%          | 8          |
| <b>GESAMT</b>   |                | <b>116</b> |

## F58 Hatten Sie das Gefühl, dass die Arbeitsbelastung Grund für Ihren Arbeitsausfall war?

Beantwortet: 116 Übersprungen: 6

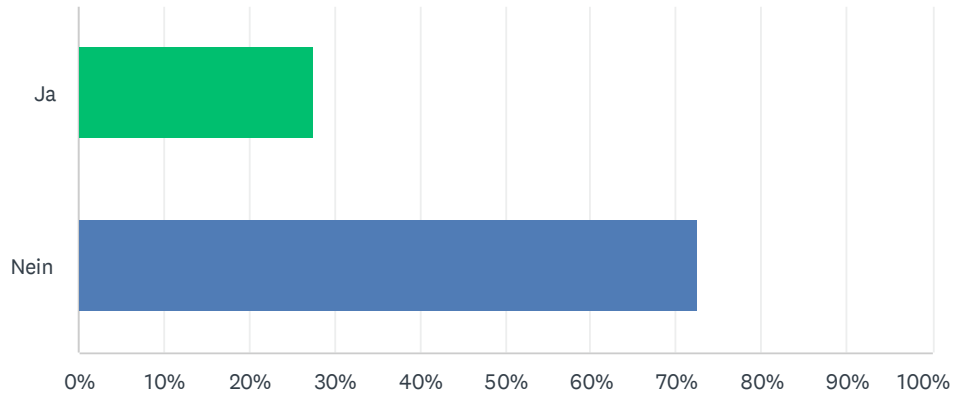

| ANTWORTOPTIONEN | BEANTWORTUNGEN |     |
|-----------------|----------------|-----|
| Ja              | 27.59%         | 32  |
| Nein            | 72.41%         | 84  |
| GESAMT          |                | 116 |

## F59 Haben Sie schon einmal Medikamente eingenommen, um trotz Krankheit zur Arbeit erscheinen zu können?

Beantwortet: 118 Übersprungen: 4

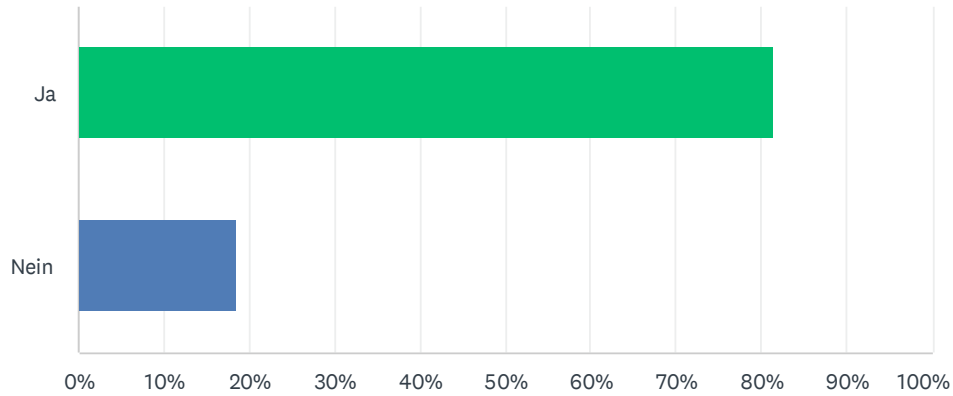

| ANTWORTOPTIONEN | BEANTWORTUNGEN |     |
|-----------------|----------------|-----|
| Ja              | 81.36%         | 96  |
| Nein            | 18.64%         | 22  |
| GESAMT          |                | 118 |

## F60 Wenn Sie in Ihrer jetzigen Situation die Wahl zwischen mehr Einkommen bei entsprechend weniger freier Zeit oder mehr freier Zeit bei entsprechend weniger Einkommen hätten, wie würden Sie sich entscheiden?

Beantwortet: 118 Übersprungen: 4

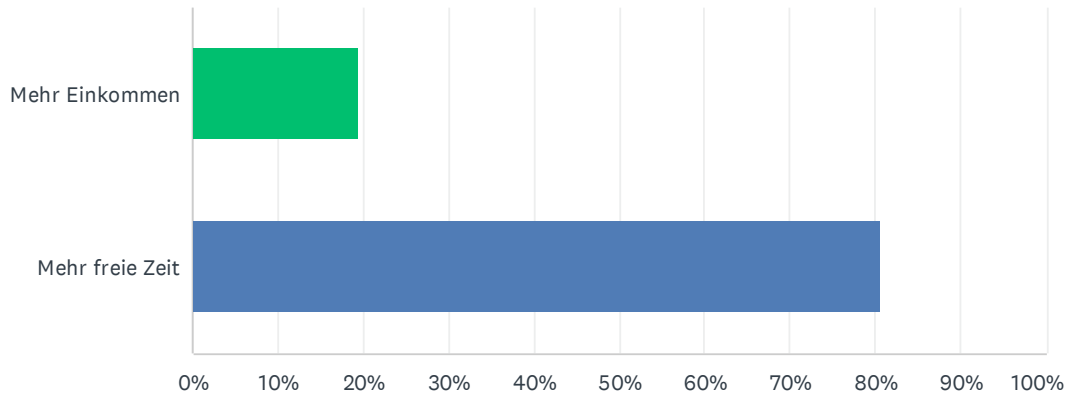

| ANTWORTOPTIONEN | BEANTWORTUNGEN |     |
|-----------------|----------------|-----|
| Mehr Einkommen  | 19.49%         | 23  |
| Mehr freie Zeit | 80.51%         | 95  |
| GESAMT          |                | 118 |

## F61 Präferieren Sie die Auszahlung geleisteter Überstunden oder die Vergütung der Überstunden als Freizeitausgleich?

Beantwortet: 118 Übersprungen: 4

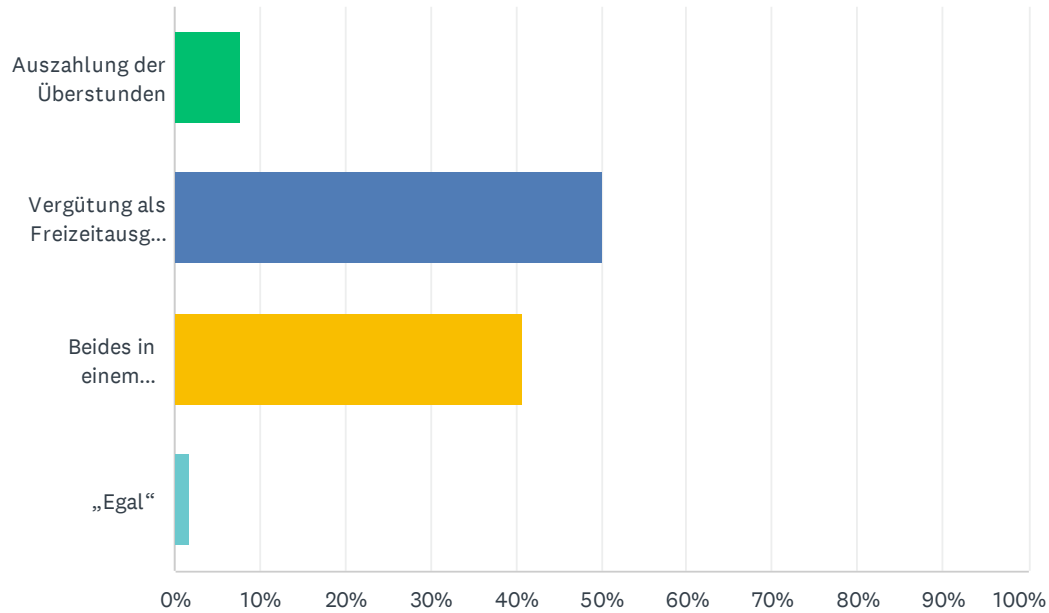

| ANTWORTOPTIONEN                                    | BEANTWORTUNGEN |            |
|----------------------------------------------------|----------------|------------|
| Auszahlung der Überstunden                         | 7.63%          | 9          |
| Vergütung als Freizeitausgleich                    | 50.00%         | 59         |
| Beides in einem ausgewogenen Verhältnis zueinander | 40.68%         | 48         |
| „Egal“                                             | 1.69%          | 2          |
| <b>GESAMT</b>                                      |                | <b>118</b> |

## F62 Beeinträchtigt Ihre derzeitige Arbeitsbelastung Ihr Privatleben überwiegend negativ?

Beantwortet: 117 Übersprungen: 5

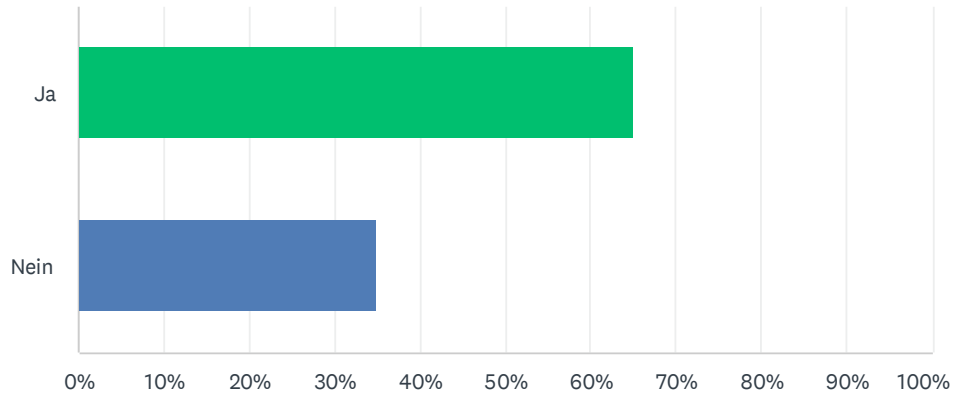

| ANTWORTOPTIONEN | BEANTWORTUNGEN |     |
|-----------------|----------------|-----|
| Ja              | 64.96%         | 76  |
| Nein            | 35.04%         | 41  |
| GESAMT          |                | 117 |

## F63 Beurteilen Sie die derzeitigen Arbeitsbedingungen in Ihrer Klinik als familienfreundlich?

Beantwortet: 117 Übersprungen: 5

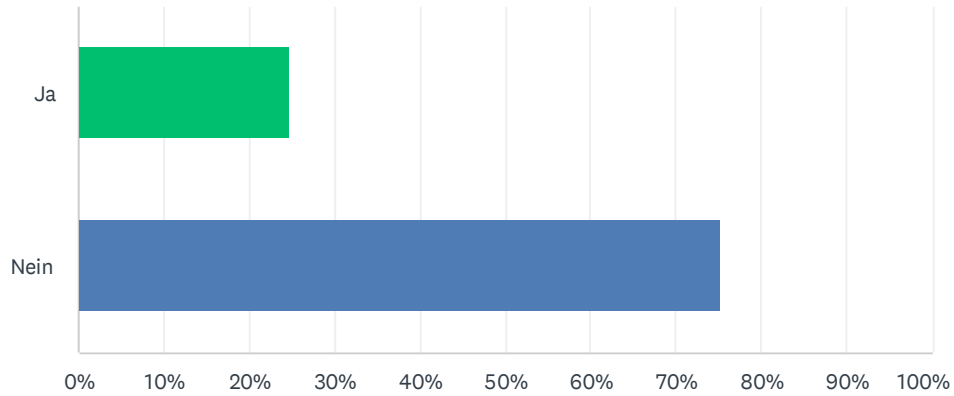

| ANTWORTOPTIONEN | BEANTWORTUNGEN |     |
|-----------------|----------------|-----|
| Ja              | 24.79%         | 29  |
| Nein            | 75.21%         | 88  |
| GESAMT          |                | 117 |

## F64 Stellt für Sie der Wechsel in die Teilzeit, unabhängig von Kindern bzw. Familie, eine alternative Option dar?

Beantwortet: 118 Übersprungen: 4

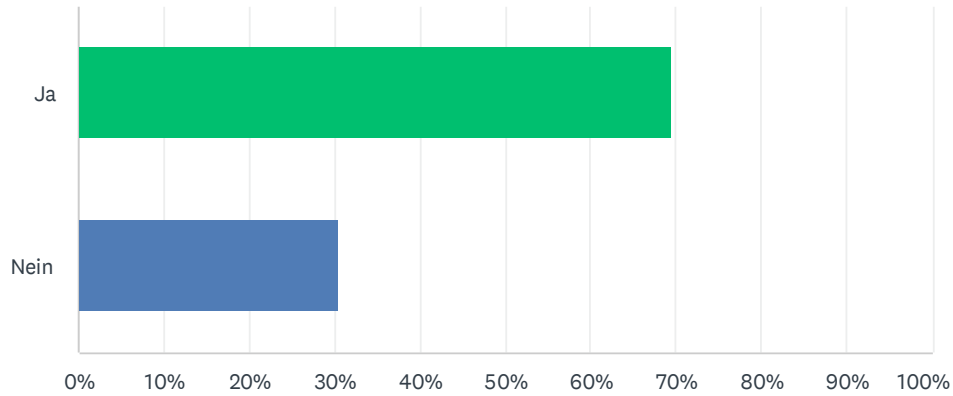

| ANTWORTOPTIONEN | BEANTWORTUNGEN |            |
|-----------------|----------------|------------|
| Ja              | 69.49%         | 82         |
| Nein            | 30.51%         | 36         |
| <b>GESAMT</b>   |                | <b>118</b> |



## F65 Erhalten Sie ausreichend Möglichkeiten, die Lehre der Studenten mitzugestalten?

Beantwortet: 117 Übersprungen: 5

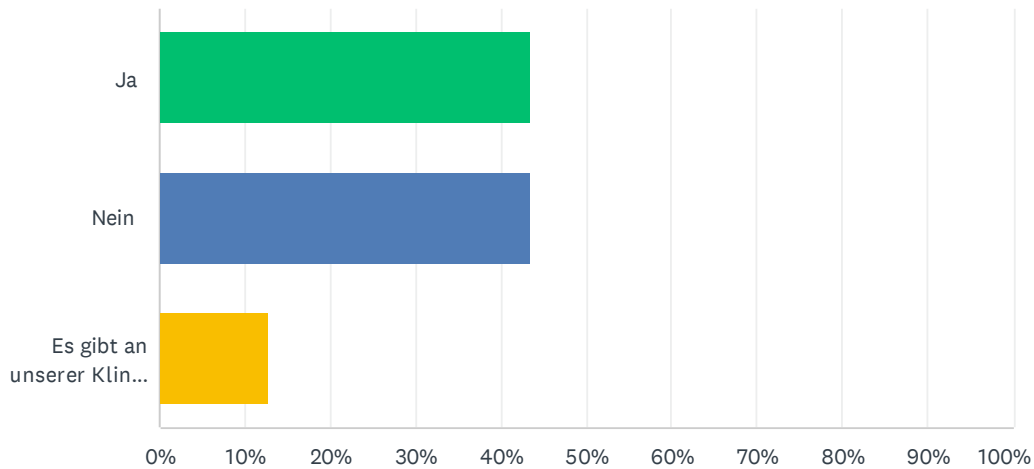

| ANTWORTOPTIONEN                       | BEANTWORTUNGEN |            |
|---------------------------------------|----------------|------------|
| Ja                                    | 43.59%         | 51         |
| Nein                                  | 43.59%         | 51         |
| Es gibt an unserer Klinik keine Lehre | 12.82%         | 15         |
| <b>GESAMT</b>                         |                | <b>117</b> |

## F66 Haben Sie schon einmal von der aktuellen DGGG-Nachwuchskampagne „GYN-WERDEN“ gehört?

Beantwortet: 117 Übersprungen: 5

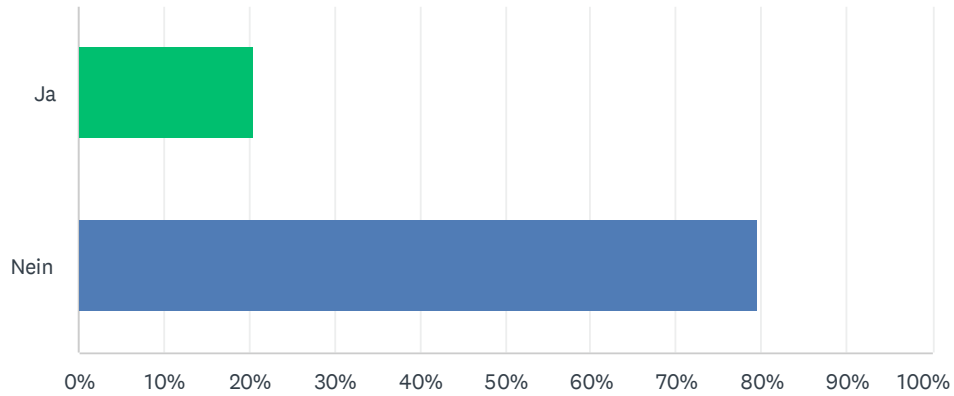

| ANTWORTOPTIONEN | BEANTWORTUNGEN |     |
|-----------------|----------------|-----|
| Ja              | 20.51%         | 24  |
| Nein            | 79.49%         | 93  |
| GESAMT          |                | 117 |

## F67 Gibt es an Ihrer Klinik Angebote wie beispielweise die „DGGG-Summer-School“, um Nachwuchs zu rekrutieren?

Beantwortet: 117 Übersprungen: 5

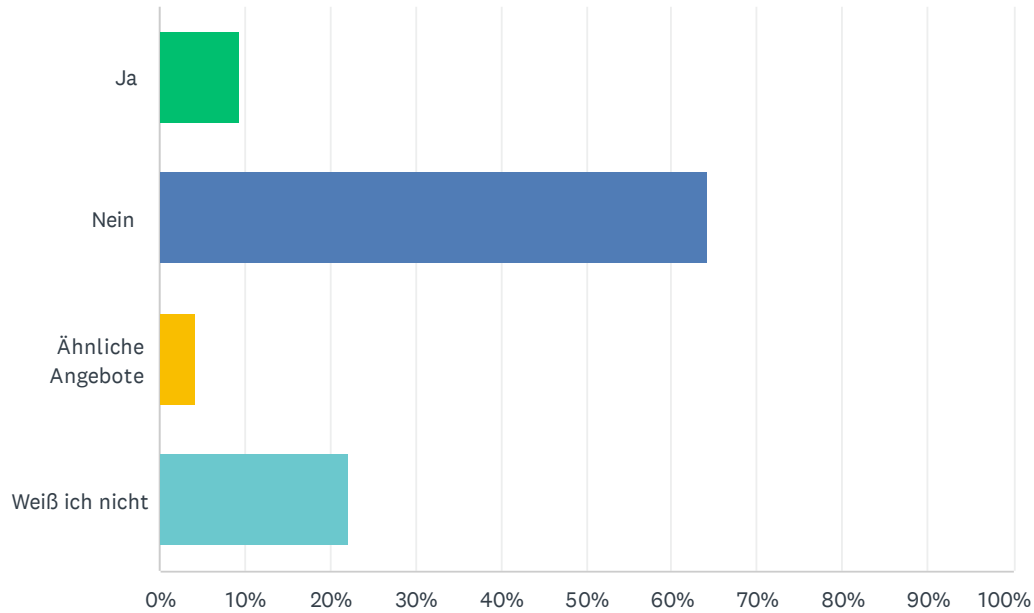

| ANTWORTOPTIONEN   | BEANTWORTUNGEN |            |
|-------------------|----------------|------------|
| Ja                | 9.40%          | 11         |
| Nein              | 64.10%         | 75         |
| Ähnliche Angebote | 4.27%          | 5          |
| Weiß ich nicht    | 22.22%         | 26         |
| <b>GESAMT</b>     |                | <b>117</b> |

## F68 Fördert Ihre Klinik Angebote, um Sie an Ihrer jetzigen Klinik zu halten?

Beantwortet: 117 Übersprungen: 5

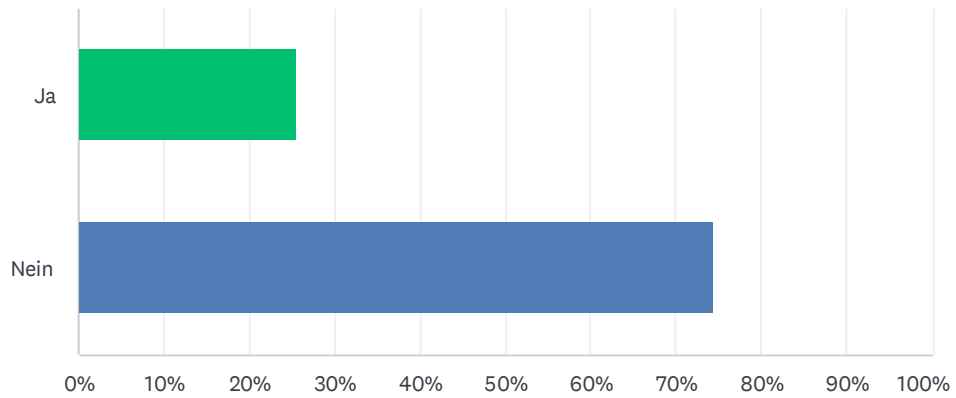

| ANTWORTOPTIONEN | BEANTWORTUNGEN |     |
|-----------------|----------------|-----|
| Ja              | 25.64%         | 30  |
| Nein            | 74.36%         | 87  |
| GESAMT          |                | 117 |

## F69 Welche Angebote bietet Ihre Klinik an, damit Sie weiterhin für diese arbeiten?

Beantwortet: 30 Übersprungen: 92

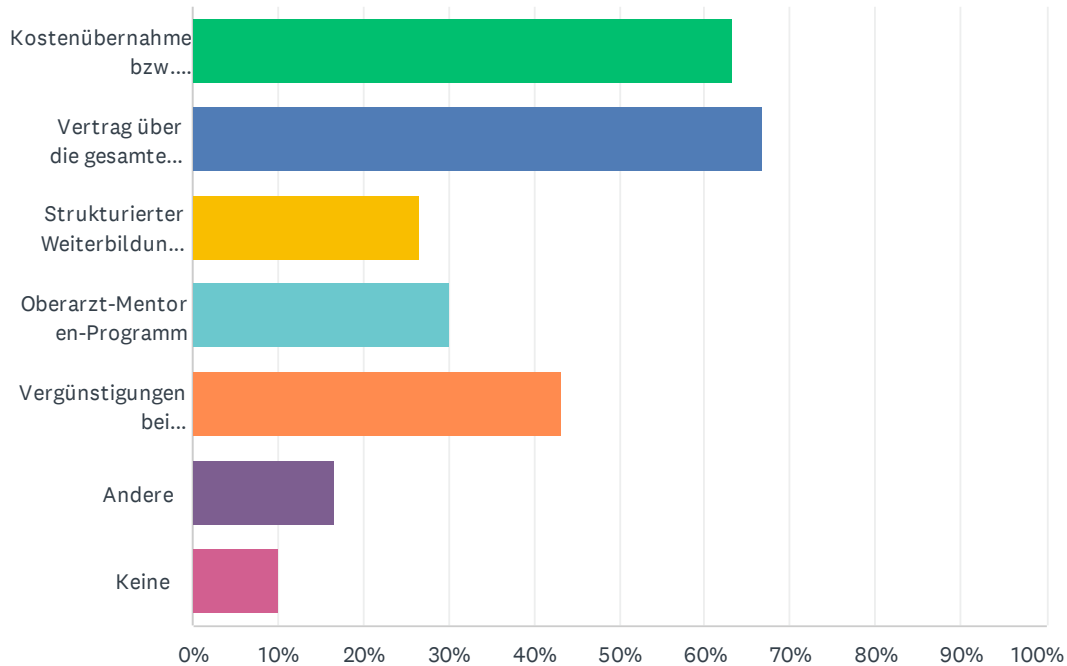

| ANTWORTOPTIONEN                                                                             | BEANTWORTUNGEN |    |
|---------------------------------------------------------------------------------------------|----------------|----|
| Kostenübernahme bzw. Kostenzuschuss für Fortbildungen                                       | 63.33%         | 19 |
| Vertrag über die gesamte Weiterbildungszeit                                                 | 66.67%         | 20 |
| Strukturierter Weiterbildungsplan (Rotationsplan)                                           | 26.67%         | 8  |
| Oberarzt-Mentoren-Programm                                                                  | 30.00%         | 9  |
| Vergünstigungen bei Drittanbietern (Fitnessstudio, Mobilfunkvertrag, Fahrradreparatur, ...) | 43.33%         | 13 |
| Andere                                                                                      | 16.67%         | 5  |
| Keine                                                                                       | 10.00%         | 3  |
| Befragte insgesamt: 30                                                                      |                |    |

F70 Wünschen Sie sich, abseits Ihrer alltäglichen Arbeit, durch die Klinik Angebote in Ihrer freien Zeit (z.B. Sportangebote, Fitnessstudio, Mobilfunkvertrag, Fahrradreparatur, Vergünstigungen, Sonderkonditionen oder Rabattangebote, ...)?

Beantwortet: 116 Übersprungen: 6

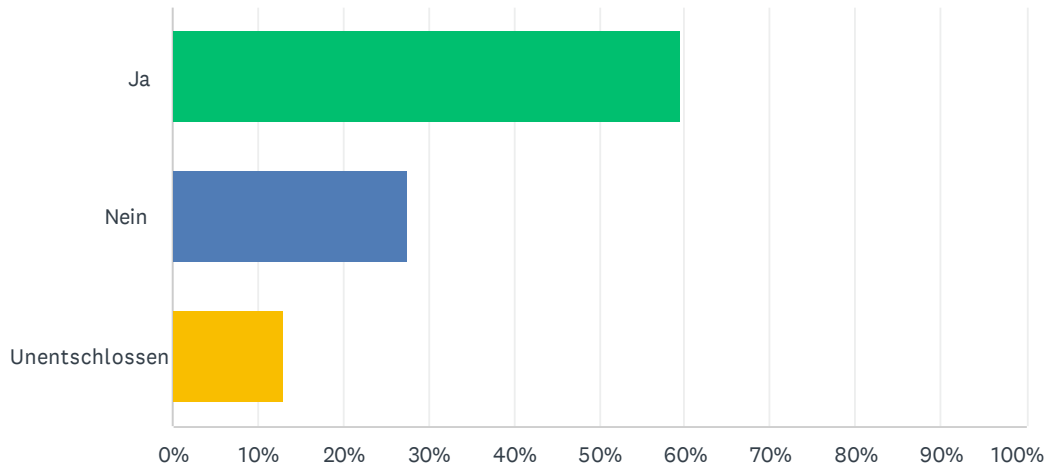

| ANTWORTOPTIONEN | BEANTWORTUNGEN |            |
|-----------------|----------------|------------|
| Ja              | 59.48%         | 69         |
| Nein            | 27.59%         | 32         |
| Unentschlossen  | 12.93%         | 15         |
| <b>GESAMT</b>   |                | <b>116</b> |

## F71 Welche Gründe haben Sie dazu bewegt, sich an Ihrer jetzigen Klinik zu bewerben (Mehrfachauswahl)?

Beantwortet: 116 Übersprungen: 6

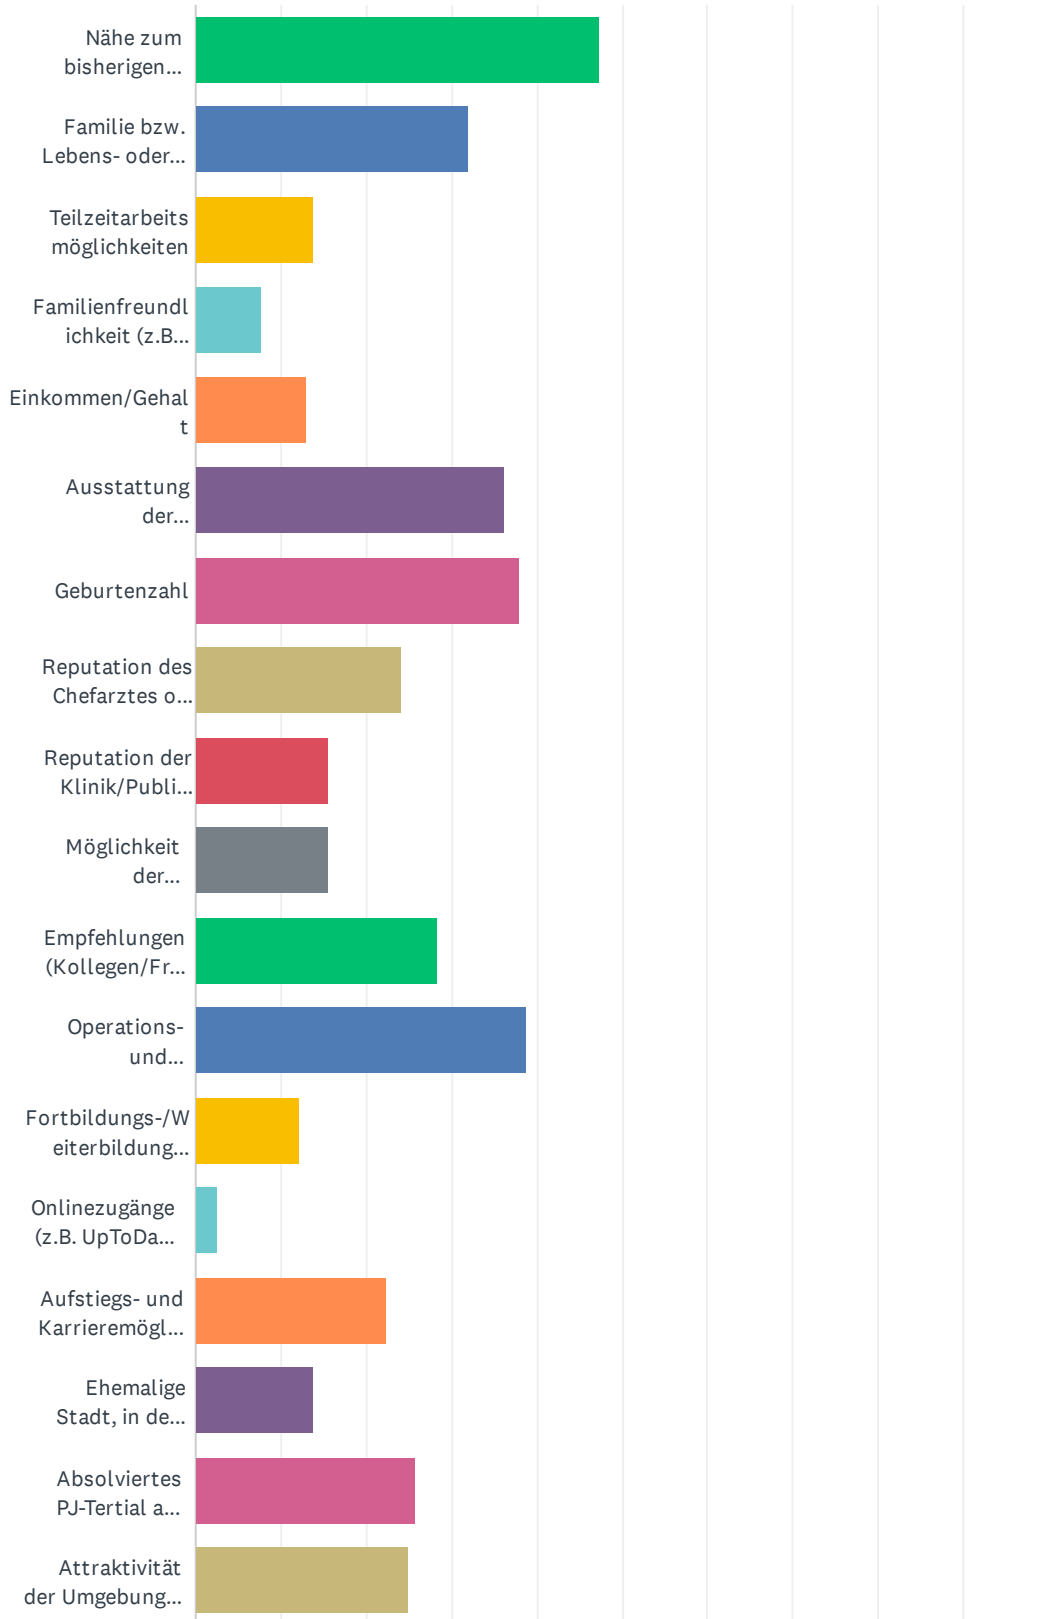

# NGGG-Umfrage 2021

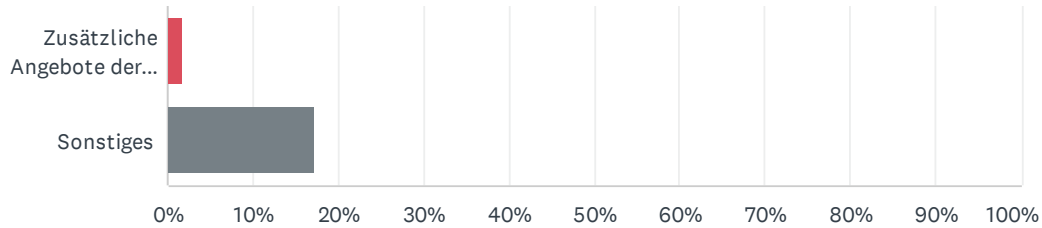

| ANTWORTOPTIONEN                                            | BEANTWORTUNGEN |    |
|------------------------------------------------------------|----------------|----|
| Nähe zum bisherigen Wohnort                                | 47.41%         | 55 |
| Familie bzw. Lebens- oder Ehepartner                       | 31.90%         | 37 |
| Teilzeitarbeitsmöglichkeiten                               | 13.79%         | 16 |
| Familienfreundlichkeit (z.B. Kita-Platz)                   | 7.76%          | 9  |
| Einkommen/Gehalt                                           | 12.93%         | 15 |
| Ausstattung der Klinik/Abteilung                           | 36.21%         | 42 |
| Geburtenzahl                                               | 37.93%         | 44 |
| Reputation des Chefarztes oder anderer Oberärzte           | 24.14%         | 28 |
| Reputation der Klinik/Publicationen                        | 15.52%         | 18 |
| Möglichkeit der wissenschaftlichen Tätigkeit               | 15.52%         | 18 |
| Empfehlungen (Kollegen/Freunde)                            | 28.45%         | 33 |
| Operations- und Leistungsspektrum                          | 38.79%         | 45 |
| Fortbildungs-/Weiterbildungsangebote                       | 12.07%         | 14 |
| Onlinezugänge (z.B. UpToDate, Thieme eRef, Springer, ...)  | 2.59%          | 3  |
| Aufstiegs- und Karriereöglichkeiten                        | 22.41%         | 26 |
| Ehemalige Stadt, in der man sein Studium absolviert hat    | 13.79%         | 16 |
| Absolviertes PJ-Tertial an der Klinik/Abteilung            | 25.86%         | 30 |
| Attraktivität der Umgebung (Freizeitangebote, Kultur, ...) | 25.00%         | 29 |
| Zusätzliche Angebote der Klinik                            | 1.72%          | 2  |
| Sonstiges                                                  | 17.24%         | 20 |
| Befragte insgesamt: 116                                    |                |    |



## F72 Wären Sie dazu bereit, bei anhaltender Unzufriedenheit Ihre Klinik zu wechseln?

Beantwortet: 116 Übersprungen: 6

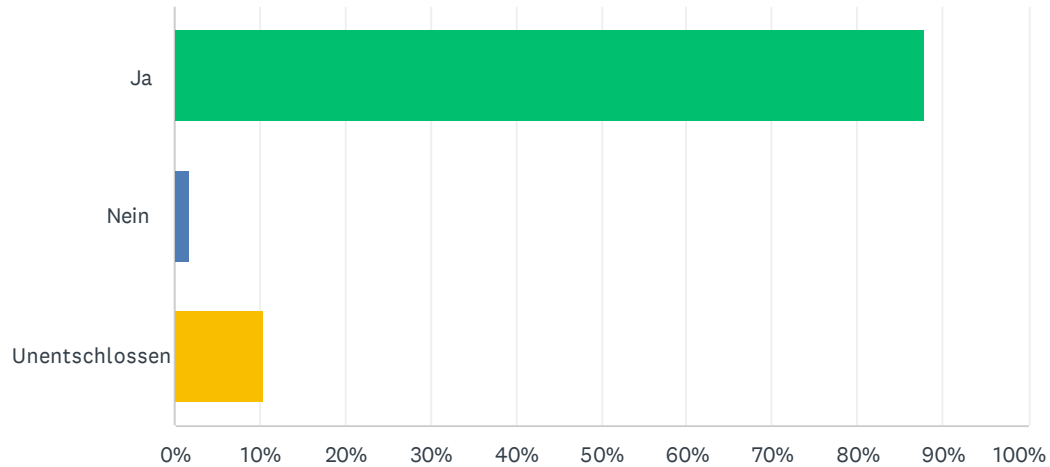

| ANTWORTOPTIONEN | BEANTWORTUNGEN |            |
|-----------------|----------------|------------|
| Ja              | 87.93%         | 102        |
| Nein            | 1.72%          | 2          |
| Unentschlossen  | 10.34%         | 12         |
| <b>GESAMT</b>   |                | <b>116</b> |

## F73 Erinnern Sie sich konkret an eine oder mehrere Situation, in der die Patientenversorgung gefährdet war?

Beantwortet: 116 Übersprungen: 6

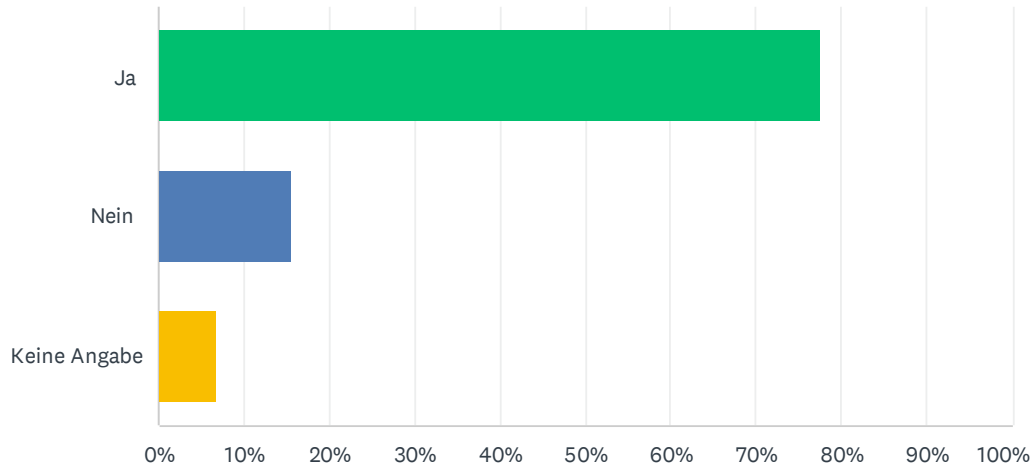

| ANTWORTOPTIONEN |  | BEANTWORTUNGEN |            |
|-----------------|--|----------------|------------|
| Ja              |  | 77.59%         | 90         |
| Nein            |  | 15.52%         | 18         |
| Keine Angabe    |  | 6.90%          | 8          |
| <b>GESAMT</b>   |  |                | <b>116</b> |

## F74 Nennen Sie einen oder mehrere Gründe, welcher bzw. welche aus Ihrer Sicht maßgeblich zur Gefährdung der Patientenversorgung beigetragen haben.

Beantwortet: 90 Übersprungen: 32

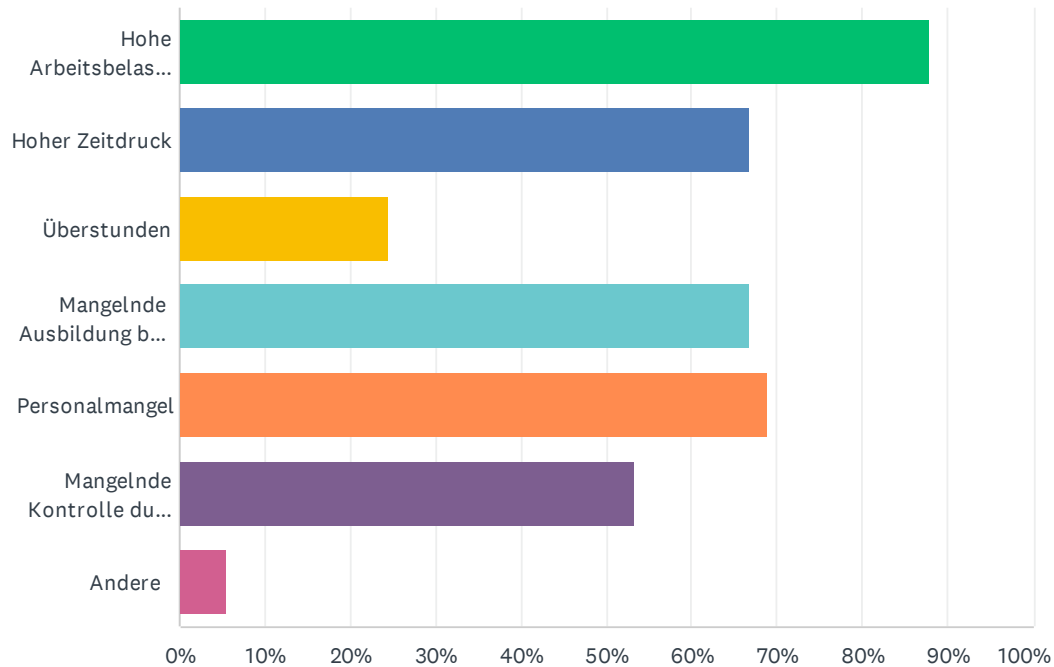

| ANTWORTOPTIONEN                               | BEANTWORTUNGEN |    |
|-----------------------------------------------|----------------|----|
| Hohe Arbeitsbelastung                         | 87.78%         | 79 |
| Hoher Zeitdruck                               | 66.67%         | 60 |
| Überstunden                                   | 24.44%         | 22 |
| Mangelnde Ausbildung bzw. Erfahrung           | 66.67%         | 60 |
| Personalmangel                                | 68.89%         | 62 |
| Mangelnde Kontrolle durch erfahrene Oberärzte | 53.33%         | 48 |
| Andere                                        | 5.56%          | 5  |
| Befragte insgesamt: 90                        |                |    |

## F75 Wer kodiert in Ihrer Klinik Diagnosen und Prozeduren?

Beantwortet: 116 Übersprungen: 6

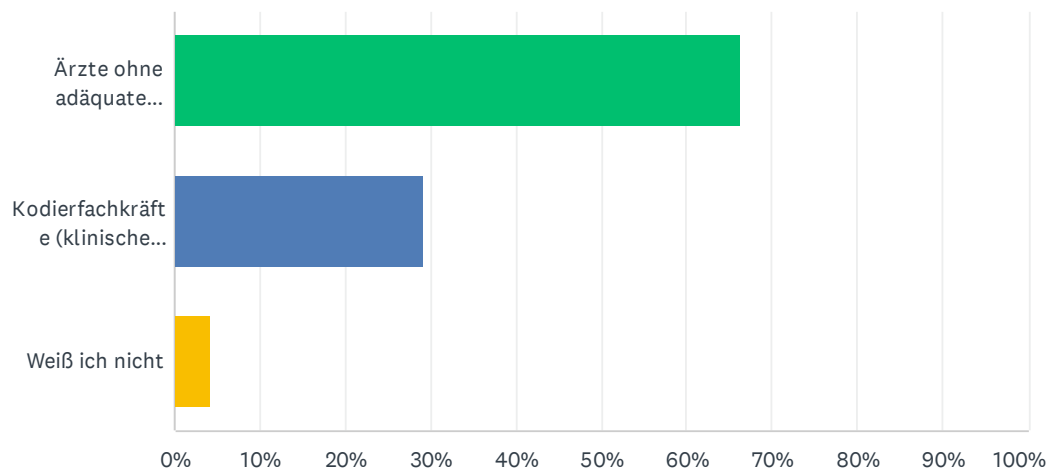

| ANTWORTOPTIONEN                                                                           | BEANTWORTUNGEN |            |
|-------------------------------------------------------------------------------------------|----------------|------------|
| Ärzte ohne adäquate Kodierkenntnisse bzw. Schulung                                        | 66.38%         | 77         |
| Kodierfachkräfte (klinische Kodierer) bzw. DRG-Beauftragte mit entsprechenden Kenntnissen | 29.31%         | 34         |
| Weiß ich nicht                                                                            | 4.31%          | 5          |
| <b>GESAMT</b>                                                                             |                | <b>116</b> |

## F76 Wussten Sie bei Ihrer Einstellung, was die Opt-Out-Regelung beinhaltet?

Beantwortet: 116 Übersprungen: 6

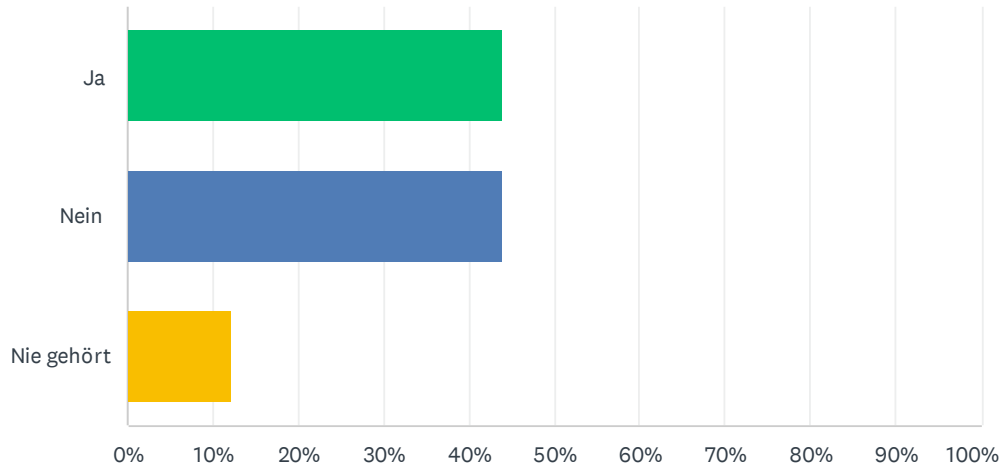

| ANTWORTOPTIONEN | BEANTWORTUNGEN |            |
|-----------------|----------------|------------|
| Ja              | 43.97%         | 51         |
| Nein            | 43.97%         | 51         |
| Nie gehört      | 12.07%         | 14         |
| <b>GESAMT</b>   |                | <b>116</b> |

## F77 Haben Sie die Opt-Out-Regelung unterschrieben?

Beantwortet: 115 Übersprungen: 7

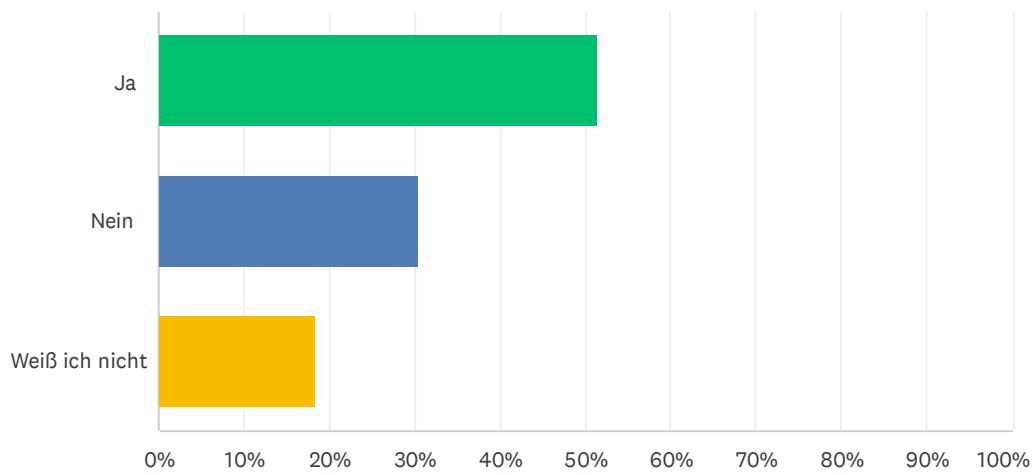

| ANTWORTOPTIONEN | BEANTWORTUNGEN |            |
|-----------------|----------------|------------|
| Ja              | 51.30%         | 59         |
| Nein            | 30.43%         | 35         |
| Weiß ich nicht  | 18.26%         | 21         |
| <b>GESAMT</b>   |                | <b>115</b> |

## F78 War die Opt-Out-Regelung Bedingung für Ihre Einstellung?

Beantwortet: 116 Übersprungen: 6

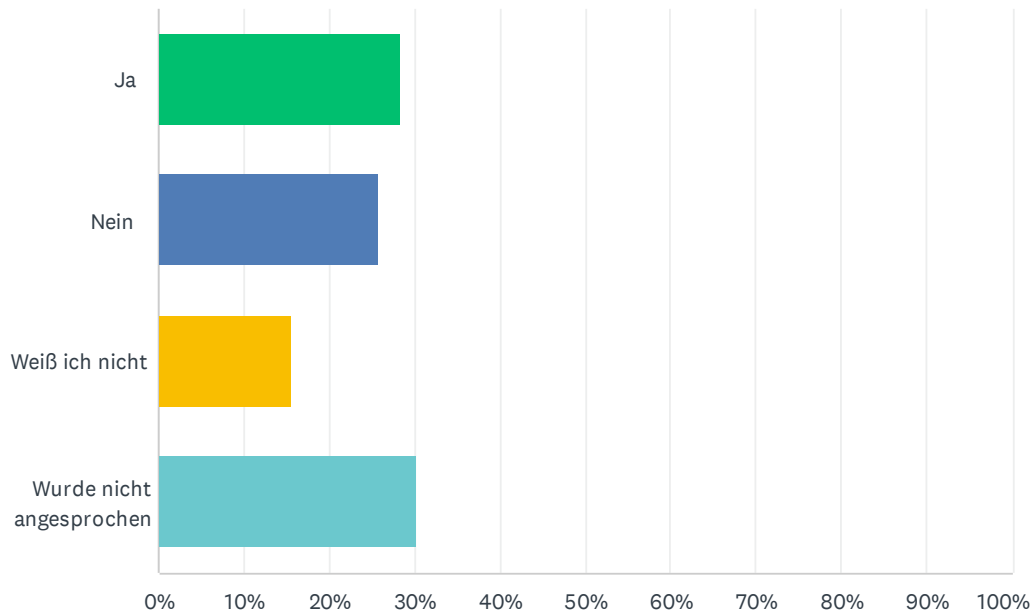

| ANTWORTOPTIONEN          | BEANTWORTUNGEN |            |
|--------------------------|----------------|------------|
| Ja                       | 28.45%         | 33         |
| Nein                     | 25.86%         | 30         |
| Weiß ich nicht           | 15.52%         | 18         |
| Wurde nicht angesprochen | 30.17%         | 35         |
| <b>GESAMT</b>            |                | <b>116</b> |

## F79 Gibt es an Ihrer Klinik Angebote, über belastende Erlebnisse im Rahmen einer Supervision zu sprechen?

Beantwortet: 116 Übersprungen: 6

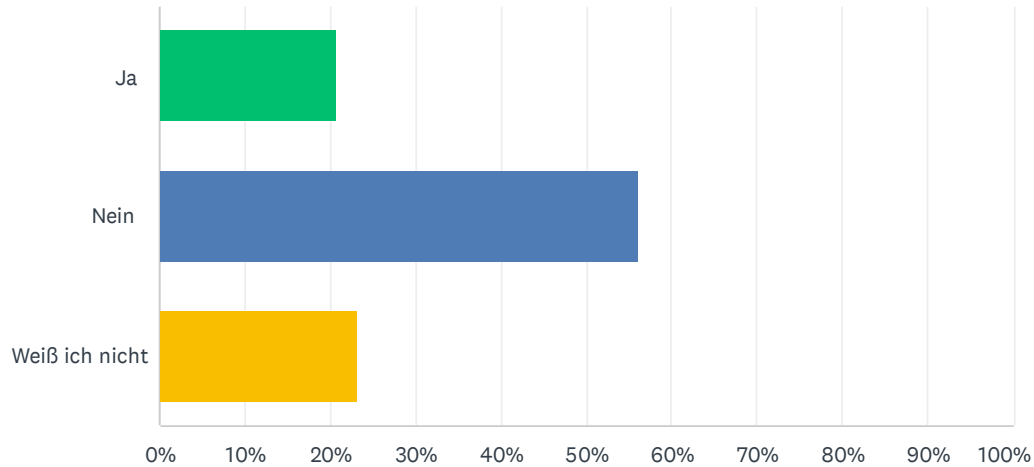

| ANTWORTOPTIONEN | BEANTWORTUNGEN |            |
|-----------------|----------------|------------|
| Ja              | 20.69%         | 24         |
| Nein            | 56.03%         | 65         |
| Weiß ich nicht  | 23.28%         | 27         |
| <b>GESAMT</b>   |                | <b>116</b> |



F80 Nennen Sie, mit der höchsten Relevanz beginnend, die Ihrer Meinung nach drei größten Probleme an Ihrer Klinik.

Beantwortet: 101 Übersprungen: 21

| ANTWORTOPTIONEN | BEANTWORTUNGEN |     |
|-----------------|----------------|-----|
| 1.)             | 100.00%        | 101 |
| 2.)             | 97.03%         | 98  |
| 3.)             | 90.10%         | 91  |

## F81 Nennen Sie drei effektive Lösungsansätze, welche die aktuelle Situation aus Ihrer Sicht verbessern könnten.

Beantwortet: 94    Übersprungen: 28

| ANTWORTOPTIONEN | BEANTWORTUNGEN |    |
|-----------------|----------------|----|
| 1.)             | 100.00%        | 94 |
| 2.)             | 94.68%         | 89 |
| 3.)             | 82.98%         | 78 |
